1 **Recruitment of transcriptional effectors by Cas9 creates cis regulatory elements and**  
2 **demonstrates distance-dependent transcriptional regulation**

3 Jubran Boulos<sup>1</sup>, Itai Ehrlich<sup>1</sup>, Nili Avidan<sup>1</sup>, Omer Shkedi<sup>1</sup>, Lilac Haimovich-Caspi<sup>1</sup>, Noam  
4 Kaplan<sup>1</sup>, Izhak Kehat\*<sup>1</sup>

5 <sup>1</sup>The Rappaport Institute and the Bruce Rappaport Faculty of Medicine, Technion – Israel  
6 Institute of Technology, 1 Efron Street, P.O. Box 9697 Haifa 3109601, Israel.

7

8 \*Corresponding author: [ikehat@technion.ac.il](mailto:ikehat@technion.ac.il)

9

10 **Keywords:**

11 Enhancer

12 Cardiac enhancer

13 Gene expression

14 CRISPR

15 Cis regulation

16

17 **Abstract**

18 It is essential to regulate the expression of genes, such as those encoding the proteins of the  
19 cardiac sarcomere. This regulation is often mediated by *cis* regulatory elements termed  
20 enhancers and repressors that recruit transcription factors to gene-distal sites. However, the  
21 relationship between transcription factors recruitment to gene-distant sites and the regulation of  
22 gene expression is not fully understood. Specifically, it is unclear if such recruitment to any  
23 genomic site is sufficient to form an enhancer or repressor at the site, and what is the relationship  
24 between the *cis* regulatory element's position and its ability to control the transcription of distant  
25 genes. Using dead Cas9 to recruit either viral or endogenous transcription factor activation  
26 domains, we demonstrate that targeting 'naïve' genomic sites lacking open chromatin or active  
27 enhancer marks is sufficient to alter the chromatin signature of the target site, the distant gene  
28 promoter, and significantly induce the distant gene expression, even across chromatin insulating  
29 loci. The magnitude of induction is affected by the distance between the activation site and the  
30 cognate gene in a non-linear manner. Dead Cas9 mediated recruitment of repression domains  
31 behave similarly to activation in that targeting of non-regulatory regions could repress gene  
32 expression with a nonlinear distance dependence and across chromatin insulating loci. These  
33 findings expand the models of enhancer generation and function by showing that an arbitrary  
34 genomic site can become a regulatory element and interact epigenetically and transcriptionally  
35 with a distant promoter. They also provide new fundamental insights into the rules governing gene  
36 expression.

37

38 **Acronyms:**

39 CREs, *Cis*-acting regulatory elements

40 CRISPR, Clustered regulatory interspaced, short palindromic repeats

41 CAS9, CRISPR-associated protein 9

42 dCas9, nuclease-dead mutant of Cas9

43 CRISPRa, CRISPR activation

44 CRISPRi, CRISPR inhibition

45 TSS, transcription start site

- 46 KRAB, Kruppel associated box
- 47 ChIP-qPCR, chromatin immunoprecipitation followed by quantitative polymerase chain reaction
- 48 ATAC, assay for transposase-accessible chromatin
- 49 H3K27ac, histone H3 acetylated at lysine 27
- 50 H3K4me1, histone H3, monomethylated at lysine 4
- 51 FIB, fibroblasts
- 52 CM, cardiomyocytes
- 53 TAD, topologically associating domain
- 54 smFISH, single molecule fluorescence in-situ hybridization

## 55 **Introduction**

56 Cells can control the expression of their genes through complex regulatory networks, which  
57 include the target gene and its regulators. *Cis*-acting regulatory elements (CREs) like enhancers  
58 and repressors control distant genes' expression and play a critical role in gene expression (Field  
59 and Adelman, 2020; Rosa-Garrido et al., 2018). The understanding of gene regulation has  
60 advanced significantly, but many questions remain unanswered, especially regarding the  
61 relationship between transcription factor recruitment to gene-distant sites and the regulation of  
62 gene expression. Particularly, it is unclear whether such recruitment to any genomic site is  
63 sufficient to form a *cis*-regulatory element at the site and control the expression of distant genes,  
64 and how the *cis*-regulatory element's position affects its ability to do so.

65 Recently, the CRISPR/Cas9 system (clustered regularly interspaced short palindromic repeats  
66 and CRISPR-associated protein 9) has been repurposed to modulate endogenous gene  
67 expression. CRISPR activators (CRISPRa), composed of a nuclease-dead mutant of Cas9  
68 (dCas9) tethered to various transcription factor activator domains were used to induce gene  
69 expression (Chavez et al., 2016; Cheng et al., 2013; Gilbert et al., 2014, 2013; Kearns et al.,  
70 2014; Konermann et al., 2015; Lin et al., 2015; Maeder et al., 2013; Mali et al., 2013; Perez-Pinera  
71 et al., 2013; Simeonov et al., 2017; Tanenbaum et al., 2014). Of those, A hybrid dCas9- VP64-  
72 p65-Rta tripartite activator (dCas9-VPR) showed a strong, synergistic activation of several genes,  
73 including cardiac genes, when targeted to their promoters (Chavez et al., 2015). Two large  
74 screens based on VP64 activation domains and pooled tiling gRNA libraries showed enrichment  
75 in gRNAs targeting the proximal promoter near the transcription start sites (TSS) (Gilbert et al.,  
76 2014; Simeonov et al., 2017) or in gRNAs targeting regulatory elements marked by open  
77 chromatin and Histone 3 Lysine 27 acetylation (H3K27ac) (Simeonov et al., 2017). A dCas9 fused  
78 to the p300 histone acetyltransferase domain could activate genes when targeted to enhancers,  
79 while dCas9-VP64 did not (Hilton et al., 2015). Collectively, these studies showed that CRISPRa  
80 can activate genes and identify regulatory elements but implied that the efficiency of these tools  
81 is limited to targeting promoters and enhancers.

82 Similarly, CRISPR inhibitors (CRISPRi) were developed by tethering the krüppel-associated box  
83 (KRAB) repression domain to dCas9 (Fulco et al., 2019, 2016; Gao et al., 2014; Klann et al.,  
84 2017; Thakore et al., 2015; Xie et al., 2017). Screens that used dCas9-KRAB and tiling pools of  
85 gRNA (Fulco et al., 2016; Gilbert et al., 2014) or pools of gRNA directed at DNase hypersensitive  
86 sites (Klann et al., 2017; Xie et al., 2017) showed that gRNAs targeting proximal promoters or  
87 enhancers were enriched. As with CRISPRa, these studies showed that CRISPRi could repress

88 genes or screen for regulatory elements, but implied that the efficacy of these tools was limited to  
89 targeting promoters and enhancers.

90 CREs such as enhancers and repressors are binding sites for a collection of transcription factors  
91 that together modulate the activity of distant genes (Field and Adelman, 2020). We hypothesized  
92 that CRISPRa and CRISPRi can be used to simulate the *de novo* creation of a CRE because they  
93 allow the recruitment of multiple transcription factor activation or repressor domains to specific  
94 sites in the genomic context. We thus set out to identify the requirements and consequences of  
95 such *de novo* CRE generation and to determine the effects of the position of the CRE on the  
96 transcriptional output of distant genes. To this end we used CRISPRa to activate cardiac genes  
97 in fibroblasts, where they are not normally expressed, and CRISPRi to repress them in  
98 cardiomyocytes, where they are highly expressed. We systematically targeted dCas9 effectors to  
99 multiple sites within a 140 Kbp window in 6 genomic loci and show that recruiting either viral or  
100 endogenous transcription factor effector domains using dCas9 to a naïve genomic site is sufficient  
101 to alter the chromatin marks of the targeted site, the distant gene promoter, and change the distant  
102 gene expression even from distances of up to 70 Kbp away. This transcriptional control can cross  
103 neighboring genes and chromatin insulating loci, and act regardless of the existence of open  
104 chromatin at the targeted sites. The effects are non-linearly dependent on the distance and are  
105 often stronger when targeting sites close to the gene, providing a model of CRE generation and  
106 function.

107

## 108 **Results**

### 109 **Cardiac enhancers are distributed around cardiac specific genes.**

110 To analyze the distribution of endogenous regulatory elements relative to genes, we mapped the  
111 position of cardiac-specific regulatory elements relative to cardiac-specific genes. We previously  
112 used H3K27ac ChIP-seq, ATAC-seq, and RNA-seq in fibroblasts (FIB) and cardiomyocytes (CM)  
113 to identify cell- type-specific regulatory elements and genes (Golan-Lagziel et al., 2018). From  
114 these data, we used the RNA-seq to concentrate on the transcription start sites (TSS) of 221  
115 highly cardiac-specific genes, defined as genes with more than 1K read counts whose expression  
116 is at least 8-fold higher in CM than in FIB, with adjusted  $p < 0.05$ . We then mapped the density of  
117 CM-specific open regulatory elements, defined by 4-fold enrichment of ATAC-seq tag counts with  
118 a Poisson enrichment  $p$ -value  $< 0.0001$  in CM vs. FIB, around the TSS of these 221 CM specific  
119 genes (Fig. 1a-b). We find that cardiac-specific regulatory elements are densely distributed within

120 10 Kbp of the TSS of cardiac-specific genes, with a non-linear decline in density as the distance  
121 from the TSS increases.

122 Studies with CRISPRa showed that activation of weakly expressed genes results in higher fold  
123 induction (Chavez et al., 2016; Konermann et al., 2015), but that the degree of activation is highly  
124 variable among genes (Lin et al., 2015; Mali et al., 2013; Perez-Pinera et al., 2013). Therefore, to  
125 map the activation range of dCas9-VPR we looked for genes that are highly expressed in CM,  
126 lowly expressed in FIB, that could be robustly activated by targeting dCas9-VPR to their promoter  
127 in FIB. From the 221 genes cardiac specific genes we chose six such CM specific genes (*Mybpc3*,  
128 *Myh7*, *Tnni1*, *Cox6a2*, *Myl3*, and *Rcan1*) whose expression is much higher in CM than in FIB (Fig.  
129 1c).

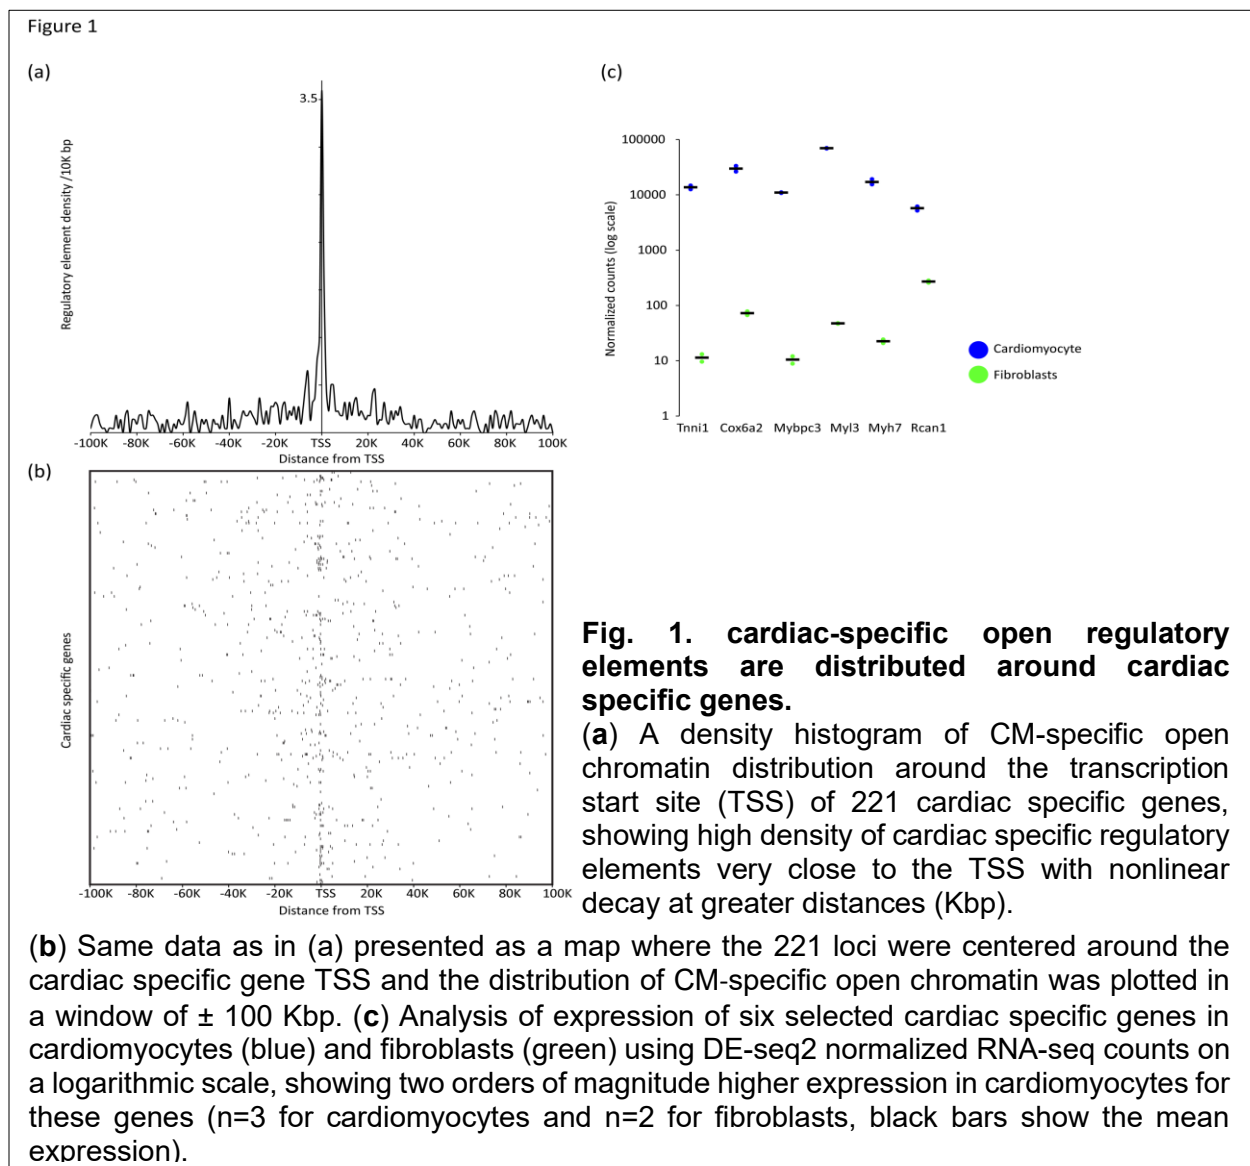

131 **Recruitment of activation domains upregulates gene expression in a distance dependent**  
132 **manner from multiple genomic loci.**

133 To identify the requirements and consequences of de novo CRE creation and to study the effect  
134 of the position of the CRE on the transcriptional output, we activated the six CM-specific genes in  
135 FIB with dCas9-VPR. Since these genes and the cardiac transcription factors controlling them are  
136 very lowly expressed in FIB, these loci provide a background with a minimal regulatory complexity  
137 for investigating the consequences of activation domain recruitment. To avoid bias and to  
138 systematically cover these loci we chose multiple gRNA target sites for activation in each locus,  
139 based solely on distance of the target site from the index gene TSS and on a predicted ability to  
140 specifically and efficiently recruit Cas9. Sites were chosen with higher density near the TSS, and  
141 with subsequent spacing steps of 5-20 Kbp (Table S1). Both CRISPRa and CRISPRi were  
142 previously used with multiplexed gRNAs with no loss of specificity (Konermann et al., 2015; Wang  
143 et al., 2019; Zhao et al., 2018). We therefore multiplexed gRNAs for *Mybpc3*, *Tnni1*, and *Rcan1*  
144 loci or for *Myh7*, *Cox6a2*, and *MyI3*, with a single gRNA for each locus. In both triplexes the  
145 targeted loci are each located on different chromosomes. FIBs were transfected with a complex  
146 of dCas9-VPR plasmid and site-specific gRNAs triplex. FIB transfected with the same complex  
147 but with a non-targeting gRNA served as controls, and qRT-PCR analysis was performed 24 Hrs  
148 after transfection to measure gene expression.

149 We measured the degree of transcriptional activation of *Mybpc3*, *Myh7*, *Tnni1*, *Cox6a2*, *MyI3*,  
150 and *Rcan1* resulting from dCas9-VPR recruitment to multiple sites, spanning 140 Kbp around the  
151 TSS, in each of these loci. In total 149 genomic sites were targeted by gRNAs, with 127 (85.2%)  
152 of those significantly eliciting a change in target gene expression. These data were used to  
153 generate activation maps for each of the six loci, where the fold activation of the index gene above  
154 the control is shown as a black bar over the site of the targeting gRNA (Fig. 2a, Fig. S1). In the  
155 *Mybpc3*, *Tnni1*, *MyI3*, and *Rcan1* loci the activation was strongest from sites close to the TSS  
156 ( $59\pm 32$ ,  $29\pm 5.5$ ,  $13.4\pm 4.4$ , or  $6.4\pm 0.57$  fold respectively). In the *Cox6a2* locus strong activation was  
157 achieved by targeting dCas9-VPR close to the TSS ( $22.7\pm 1.15$  fold) but also at several sites within  
158 30 Kbp down- and up-stream of the TSS (e.g., activation of  $16\pm 1.2$  and  $30.6\pm 3.2$  was achieved  
159 by targeting sites 20 Kbp upstream and downstream of the TSS respectively). In the *Myh7* locus  
160 only low activation was achieved by targeting multiple sites near the TSS, but strong activation  
161 ( $56\pm 10.6$  fold) was achieved by targeting a site 20 Kbp downstream, that is closer to the *Myh6*  
162 gene promoter. A summary of the degree of activation achieved in all six loci as a function of the  
163 distance from the TSS is shown in Fig. 2b.

Figure 2

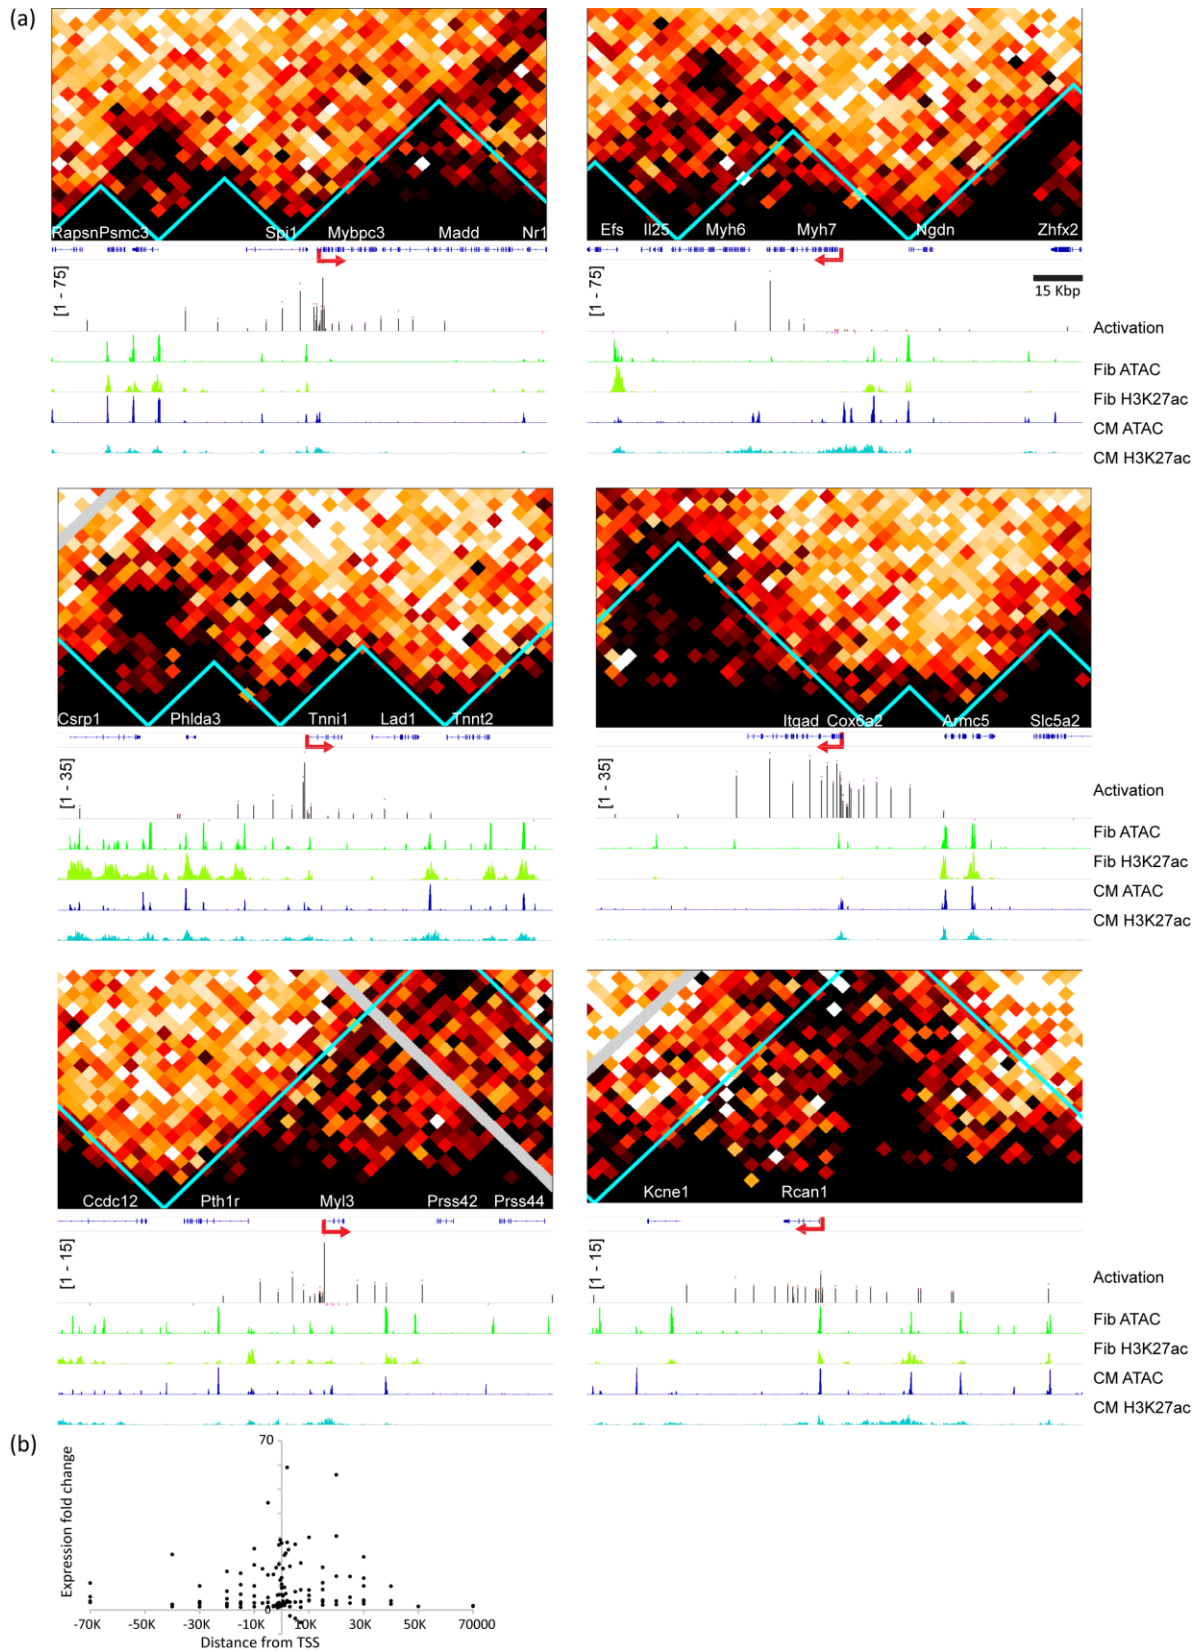



**Fig. 2. Recruitment of activation domain upregulates gene expression in a distance dependent manner from multiple genomic sites.**

(a) Activation maps shown as multi track diagrams of six cardiomyocyte specific gene loci (*Mybpc3*, *Myh7*, *Tnni1*, *Cox6a2*, *Myl3*, *Rcan1*) spanning 140 Kbp each. The TSS of each index gene is shown in red arrows. Tracks showing (from top to bottom): The genomic track with exons and introns in blue; Activation track showing index gene fold change activation following dCas9-VPR targeting to the genomic site vs. non-targeting gRNA control, as measured by RT-qPCR normalized to *Gapdh* in FIB (Scale of activation for the track is shown in square brackets, average fold activation from each gRNA site in black bars, red dots over bars indicate standard error, all black bars have  $p < 0.05$  vs. control, and sites with non-significant  $p > 0.05$  activation are shown as pink bars on the negative scale for visibility,  $n = 3$  for all sites); ATAC-seq and H3K27ac ChIP-seq tracks are shown for FIB in greens and CM in blue. HiC maps for each locus are shown above, with aqua colored lines indicating insulation locus boundaries. (b) Scatter plot showing change in target gene fold expression following specific gRNA targeting in all six genes shown in (a) as a function of the gRNA distance from the gene TSS in Kbp. Each dot represents the average of  $n = 3$  replicates, only dots were expression vs. control  $p < 0.05$  were included. The plot shows a non-linear decay in activation as a function of the distance.

165

166 Together these data show that recruitment of multiple strong activation domain using dCas9-VPR  
167 is capable of strong induction of gene expression in inactive genes. This induction is generally  
168 strongest when targeting sites near the TSS, and the degree of activation drops non-linearly as  
169 the distance from the TSS increases. Nevertheless, significant induction was still achieved from  
170 multiple non-proximal sites up to 70 Kbp away from the TSS.

171 **Genes can be activated across insulating loci from arbitrary genomic sites**

172 Topologically Associating Domains (TADs) have been suggested to specify regulatory  
173 microenvironments for enhancer-promoter interaction (Dixon et al., 2012; Lupiáñez et al., 2015;  
174 McCord et al., 2020; Nora et al., 2012; Sexton and Cavalli, 2015). We therefore asked whether  
175 dCas9-VPR activation of genes behaves differently when crossing such insulating loci. To this  
176 end, we performed Hi-C to produce the first Rat fibroblast interaction maps and identified TAD  
177 insulating loci at 5Kbp resolution using an adaptation of the insulation score (Crane et al., 2015a)  
178 (Fig. 2a). Since the activation sites were chosen solely based on their distance from the TSS,  
179 most of the targeting sites fell within the same insulating locus as the index gene, however, several  
180 targeted sites fell beyond the gene-containing insulating locus. Although these sites tended to be  
181 far from the TSS, they were in some cases still successful in upregulating the target gene (Fig.  
182 2a). We show for instance, that an activation site positioned +40 Kbp from the *Mybpc3* gene TSS,  
183 falling within a different insulating locus than the gene promoter, increased this gene activation  
184 by  $23 \pm 2.8$ -fold relative to non-targeting gRNA. To quantify the effect of insulation, without being  
185 confounded by the distance-activation relationship we looked for pairs of sites positioned at the

186 same distance from the TSS of the index gene but lying either within or outside the insulating  
187 locus of the gene. We could find 11 such pairs, located in the *Mybpc3*, *Cox6a2*, and *Tnni1* loci,  
188 where the TSS is relatively close to the insulation boundary. The effect of insulation for activation  
189 from outside compared to activation from within the locus for pairs with similar distance from the  
190 TSS was modest and not statistically significant ( $8.75 \pm 0.89$  vs  $10.35 \pm 0.97$ -fold activation  
191 respectively, paired t-test  $p=0.28$ , Fig. S2). While the number of distance matched pairs we could  
192 find was relatively small, and we cannot exclude some insulation effect, we had 80% and 92%  
193 power to detect a 75% and 90% insulation effect respectively by insulating loci.

194 Next, we asked if any genomic site could serve as a CRE if strong activation domains were  
195 recruited to it. The gRNAs used for recruiting dCas9-VPR were chosen based on a pre-specified  
196 distance from the TSS to avoid any bias. Of the targeted genomic sites 127/149 (85.2%) induced  
197 significant activation (Table S1), showing that most genomic sites within 70 Kbp from the index  
198 gene could serve for activation. We used our mapping of open chromatin by ATAC-seq and  
199 H3K27 acetylation by ChIP-seq ((Golan-Lagziel et al., 2018), GSE102532) in FIB and in CM to  
200 examine the chromatin characteristics of the activation sites prior to dCas9-VPR recruitment. This  
201 analysis showed that 80% of gRNA sites that induced a significant change in gene expression  
202 targeted closed chromatin and mostly areas devoid of active enhancer and promoter histone  
203 acetylation mark H3K27ac in either FIB or CM (Fig. S1, Fig. S3). Since very few targeting sites  
204 were located in open chromatin, and since sites near transcription start sites, where activation is  
205 strong, tend to have open chromatin, we cannot reliably determine if targeting open chromatin  
206 would result in greater activation than targeting close chromatin, nor was it our aim. Nevertheless,  
207 our data clearly shows that recruitment of dCas9-VPR to non-regulatory sites lacking open  
208 chromatin or H3K27ac marks is sufficient to induce expression of distant genes. The absence of  
209 regulatory features at many of these sites even in CM, a cell type where these genes are highly  
210 expressed, further indicates that these sites do not function as endogenous regulatory elements.  
211 Together our results show that activation can occur by targeting naïve non-regulatory sequences  
212 and across insulating boundaries.

### 213 **Recruitment of activation domains result in epigenetic activation of the targeting site and** 214 **the distant promoter**

215 H3K27ac and H3K4me1 histone modifications were both shown to mark active enhancers and  
216 promoters (Creyghton et al., 2010; Local et al., 2018). Specifically, H3K27ac can differentiate  
217 between active and poised enhancers in mammalian cells (Creyghton et al., 2010). We tested  
218 whether recruitment of activation domains to genomic sites lacking such activation marks would

219 result in histone-mark gain. To this end, two CM-specific genes, *Mybpc3* and *Cox6a2*, were  
 220 targeted for activation in FIB from site located 20 Kbp downstream of their TSS. Both targeted  
 221 distal sites have closed nucleosomes and lack significant H3K27ac active enhancer marking in  
 222 both FIB and CM (Fig. 3a). Recruiting dCas9-VPR to these sites resulted in robust induction of  
 223 *Mybpc3* and *Cox6a2* genes as measured by qRT-PCR (Fig. 3b). We then analyzed H3K4me1  
 224 and H3K27ac histone marks by CHIP-qPCR as a percentage of input at both the gRNA targeting  
 225 site, 20 Kbp from the TSS, as well as at the gene promoter. Two primer pairs, ~300 bp apart,  
 226 were used for each of these regions. This analysis showed that recruitment of a strong tandem  
 227 activation domains to a distant non-regulatory site was sufficient to confer active regulatory  
 228 element histone marks, H3K27ac and H3K4me1, at both the targeted site and at the promoter,  
 229 compared to cells transfected with non-targeting gRNA (Fig. 3c).

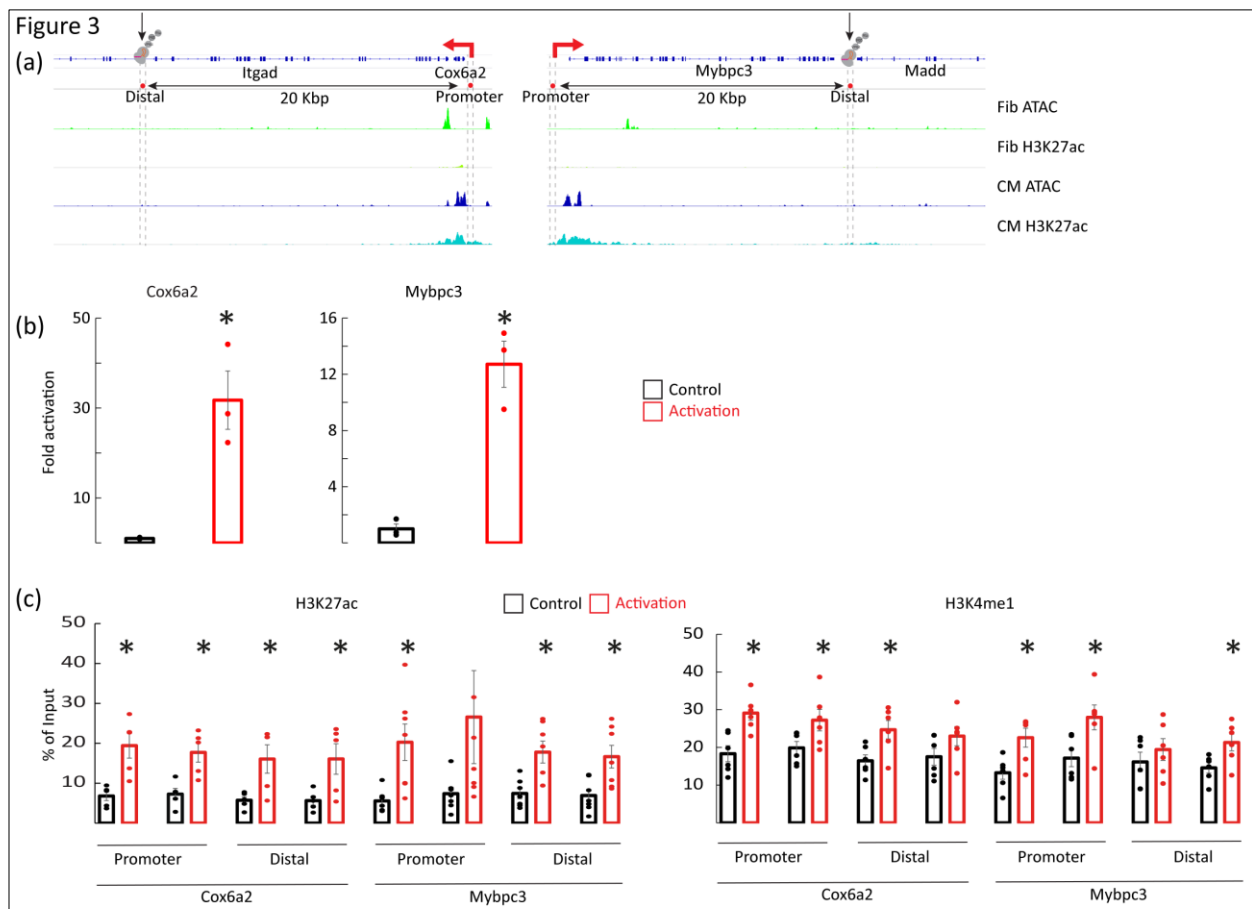

**Fig. 3. Activation from distal sites confers epigenetic marks at the activated site and at the gene promoter.**

(a) A diagram of the *Cox6a2* and *Mybpc3* loci with a genomic track showing exons and introns in blue and ATAC-seq and H3K27ac ChIP-seq track in CM and FIB. A distal locus, marked by a black arrow and cross-hatched lines, was activated by dCas9-VPR in FIB. We then assessed *Cox6a2* and *Mybpc3* activation and the epigenetic marks at the distal site of activation and at the promoter of these genes (red arrow). As shown, prior to activation the distal sites lacked ATAC and H3K27ac marks in both FIB and CM, and the promoter lacked such marks in FIB. (b) qRT-PCR results show that dCas9-VPR targeting the 20 Kbp distal site induces strong gene activation. Data is shown as fold activation vs. non targeting gRNA control normalized to *Gapdh* (n=3, \* p<0.01). (c) ChIP-qPCR analysis of H3K27ac (left) and H3K4mm (right) histone marks shows increased chromatin modification of both the distal activation site and the gene proximal promoter following activation of the distal site. For each promoter and distal site two separate primer pairs were used, amplifying regions ~ 300 bp apart. (n=5-8 for each primer pair) in N=2-3 independent experiments (\*p<0.05).

231

232 **Recruitment of endogenous transcription factor activation domains shares many**  
233 **properties with recruitment of viral activation domains**

234 The activation domains VP64 and Rta in dCas9-VPR are derived from viral genes. We wanted to  
235 examine if the properties we observed with dCas9-VPR also apply to non-viral activation domains.  
236 The cardiac transcription factors *Gata4*, *Nkx2-5*, and *Tbx5* often co-occupy the same enhancers  
237 and their activation domains were previously identified (Morrisey et al., 1997; Ranganayakulu et  
238 al., 1998; Zaragoza et al., 2004). We used them to create dCas9-*Gata4-Nkx2-5-Tbx5* (dCas9-  
239 GNT) endogenously based CRISPRa tool (Fig. 4a). We selected 18 gRNA target sites covering  
240 a distance up to  $\pm$  30 Kbp from the TSS of the *Tnni1* and the *Cox6a2* genes, and mapped the  
241 activation induced by dCas9-GNT from these sites in FIB (Fig. 4b). This analysis shows that  
242 activation by dCas9-GNT behaved similarly to activation by dCas9-VPR in that dCas9-GNT could  
243 activate genes from a distance, even when targeting 'naive' genomic sites lacking open chromatin  
244 or active enhancer marks, and that the activation tended to be stronger when targeting sites near  
245 the promoter of the genes. Like dCas9-VPR the dCas9-GNT could activate these gene across an  
246 insulation boundary, and for example we could achieve a  $6.4 \pm 1$  and  $2.88 \pm 0.23$  fold activation of  
247 the *Tnni1* and *Cox6a2* genes respectively from sites located 30 Kbp upstream of these genes and  
248 in a different insulating locus. Finally, we chose a site located 15 Kbp upstream of the *Myh7* that  
249 lacked open chromatin or H3K27ac marks in FIB for activation by dCas9-GNT (Fig. 4c-d). The  
250 ChIP-qPCR showed that recruitment of dCas9-GNT to this site was sufficient to confer the active  
251 enhancer histone mark H3K27ac to both the targeted site and the *Myh7* promoter (Fig. 4e).  
252 Together these data show that endogenous transcription factor activation domains share the  
253 properties we observed with the viral derived activation domains in VPR.

Figure 4

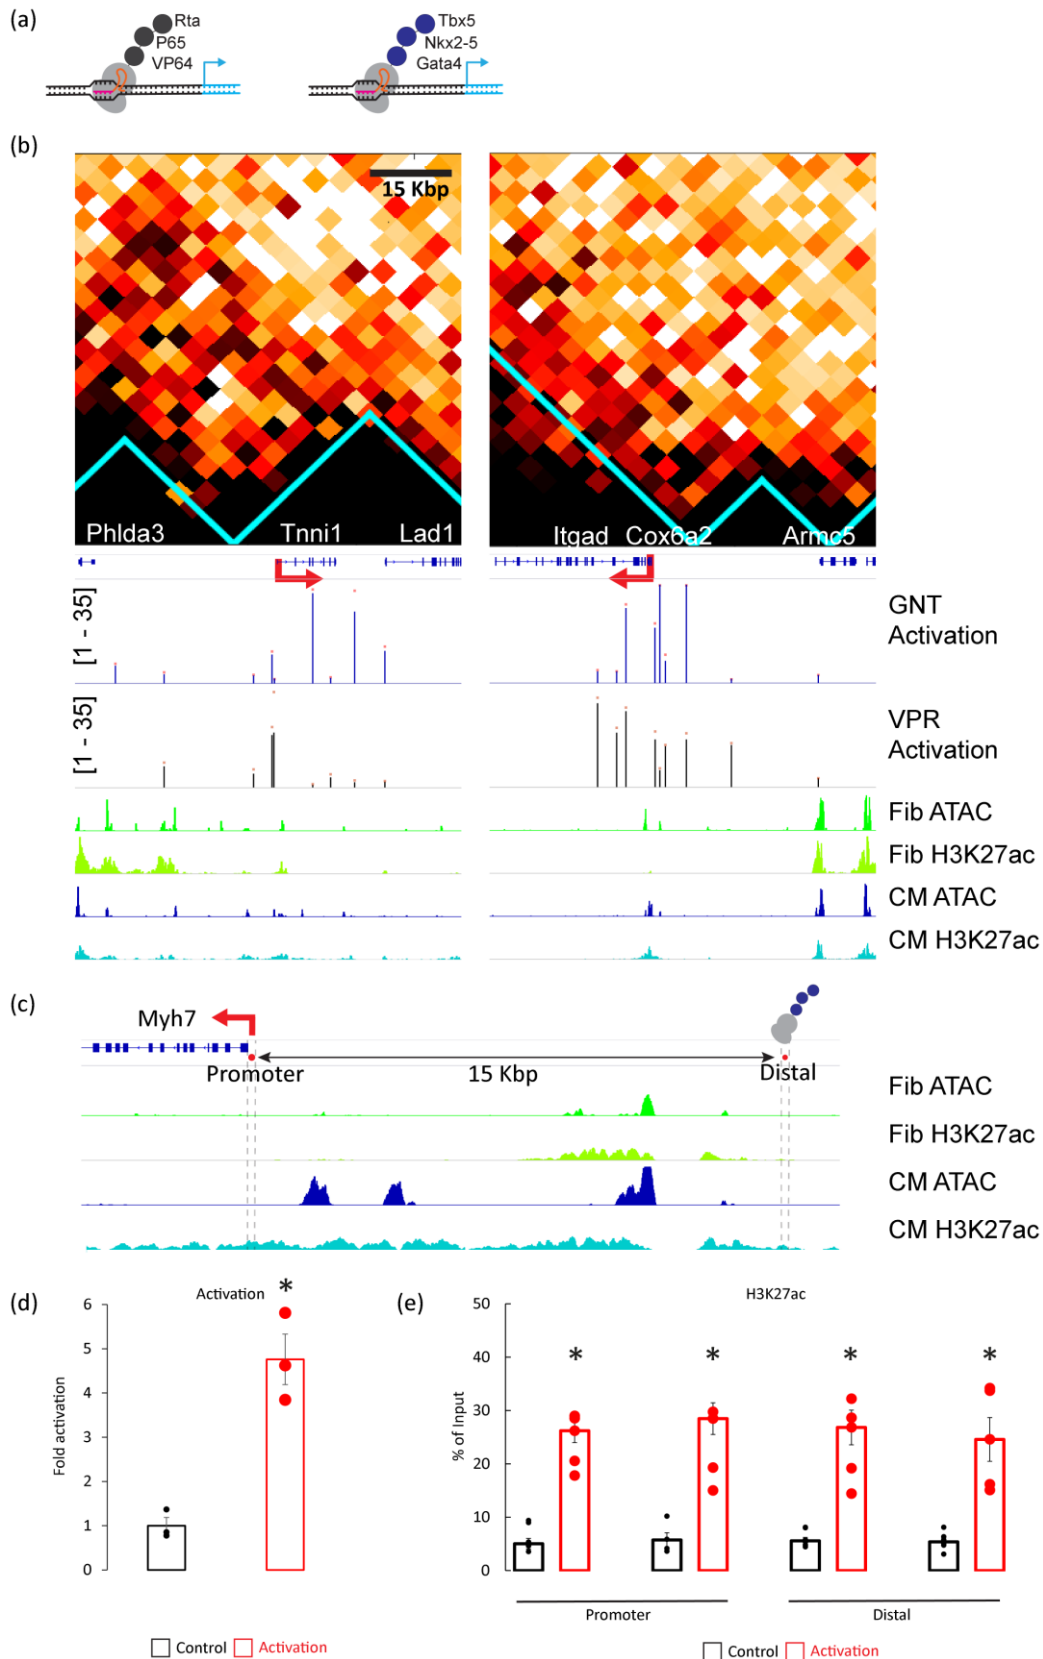

**Fig. 4. Activation with endogenous activation domains has similar features to activation with viral derived activation domains.**

(a) Diagram of CRISPR activators composed of dCas9 tethered to the activation domains of VP64, p65 and Rta (dCas9-VPR, left) or dCas9 tethered to the activation domains of the endogenous cardiac transcription factors Gata4, Nkx2-5, and Tbx5 (dCas9-GNT, right) (b) Activation maps as multi track diagrams of two cardiomyocyte specific gene loci (*Tnni1*, *Cox6a2*) are shown in a 70 Kbp window around the TSS. Tracks showing (from top to bottom): The genomic track with exons and introns in blue; Activation tracks showing target gene average fold activation following dCas9-GNT in blue bars or activation with dCas9-VPR in black bars targeted to the genomic site vs. non-targeting gRNA control, as measured by RT-qPCR normalized to *Gapdh* in FIB (Scale of activation for the track is shown in square brackets, red dots over bars indicate standard error, only bars with  $p < 0.05$  vs. control are shown,  $n=3$ ). Tracks of ATAC-seq and H3K27ac ChIP-seq are shown for FIB in green and CM in blue. Diagram shows similar activation by dCas9-GNT and dCas9-VPR from distal sites lacking open chromatin or H3K27ac marks. (c) A diagram of the *Myh7* locus with a genomic track showing exons and introns in blue and ATAC-seq and H3K27ac ChIP-seq track in CM and FIB. A distal site, 15 Kbp from the TSS, marked by a red dot and cross-hatched lines, was activated by dCas9-GNT in FIB. We then assessed the H3K27ac marks at the distal site of activation and at the promoter of these genes (red arrow). (d) qRT-PCR results show that dCas9-GNT targeting the 15 Kbp distal site induces strong activation of *Myh7* in FIB. Data is shown as fold activation vs. non targeting gRNA control normalized to *Gapdh* ( $n=3$ , \*  $p < 0.005$ ). (e) ChIP-qPCR analysis of H3K27ac activation marks shows increased chromatin modification of both the distal activation site and the gene proximal promoter following activation of the distal site by dCas9-GNT. For each promoter and distal site two separate primer pairs were used, amplifying regions ~ 300 bp apart. ( $n=5-8$  for each primer pair in  $N=2-3$  independent experiments, \* $p < 0.05$ ).

255

256 **Recruitment of repression domain downregulates gene expression in a distance-**  
257 **dependent manner from multiple genomic loci.**

258 Next, we examined whether repression has similar properties to activation. We used dCas9 fused  
259 to the endogenous repression domain KRAB and asked if the same targeting sites used in FIB  
260 for gene activation with dCas9-VPR could be used for repression with dCas9-KRAB in CM, where  
261 these genes are highly expressed. Specifically, the *Myh7* and *Mybpc3* loci were targeted in CM  
262 from sites up to 70 Kbp away from their TSS. We used some of the same gRNAs used in FIB for  
263 activation and elicited significant activation in FIB. In total, 17 targeted sites were studied for their  
264 effect on gene repression in CM (Table S2). The KRAB repression domain recruitment in CM  
265 showed a similar pattern to the one observed with VPR activation domain recruitment in FIB (Fig.  
266 5a). A robust repression was elicited from sites near the target gene TSS, with a decline in  
267 repression when targeting from a distance. Gene repression was achieved even when targeting  
268 sites with nucleosomal chromatin and with no active enhancer marking (Fig. S4), and like in  
269 activation, repression of target genes was achievable by recruitment of the repression domain to  
270 genomic loci residing in different insulating locus. For example, targeting a site 70 Kbp upstream

271 of the *Mybpc3* gene TSS induced robust downregulation of 53% compared to non-targeting gRNA  
272 (n=3, p<0.05). By plotting gene fold activation in FIB as a function of percentage of repression in  
273 CM, elicited by the same gRNAs, we show that activation and repression, using CRISPRa and  
274 CRISPRi respectively, are weakly correlated with Spearman's Rho 0.34 (2 tailed p=0.176, n=17)  
275 (Fig. 5b).

276 Next, we evaluated the repression of the *Myh6* gene, that encodes for cardiac  $\alpha$ -myosin. We  
277 compared the degree of *Myh6* gene repression induced by targeting the promoter of *Myh6* or a  
278 distal site, 6 Kbp upstream of *Myh6* promoter, with dCas9-KRAB in CM (Fig. 6a). This upstream  
279 distal site resides inside the nearby *Myh7* gene. While the proximal promoter site has open  
280 chromatin in CM, the targeted distal site does not have this feature of a regulatory site, based on  
281 the ATAC-seq data (Fig. 6a). Gene expression analysis by qRT-PCR shows that targeting either  
282 the promoter or the distal sites resulted in significant gene repression (n=3, p<0.05) (Fig. 6b). In  
283 addition, we confirmed the repression by dCas9-KRAB using single molecule mRNA Fluorescent  
284 in-situ hybridization (smFISH). The quantification of smFISH signal in the nuclear transcription  
285 sites and of the cytoplasmic signals are surrogate measurements for the transcription rate and  
286 the mRNA levels respectively (Bahar Halpern et al., 2015; Lewis et al., 2018), and we have  
287 previously used this approach to study the transcription of the *Myh6* gene (Lewis et al., 2018).  
288 Representative images of the *Myh6* smFISH analysis in control CM and after repression from the  
289 distal site or from the promoter site show marked reduction in both nuclear sites and cytoplasmic  
290 signal (Fig 6c). Quantification of the smFISH images by FISH Quant tool (Mueller et al., 2013)  
291 showed significant reduction in both the cytoplasmic and transcription site smFISH signal by  
292 targeting either the distal or the promoter sites (Fig. 6d-e). These data confirm our qRT-qPCR  
293 analysis and show at the single cell level that recruitment of dCas9-KRAB to a distal site with  
294 closed chromatin can reduce the transcription rate of the targeted gene.

Figure 5

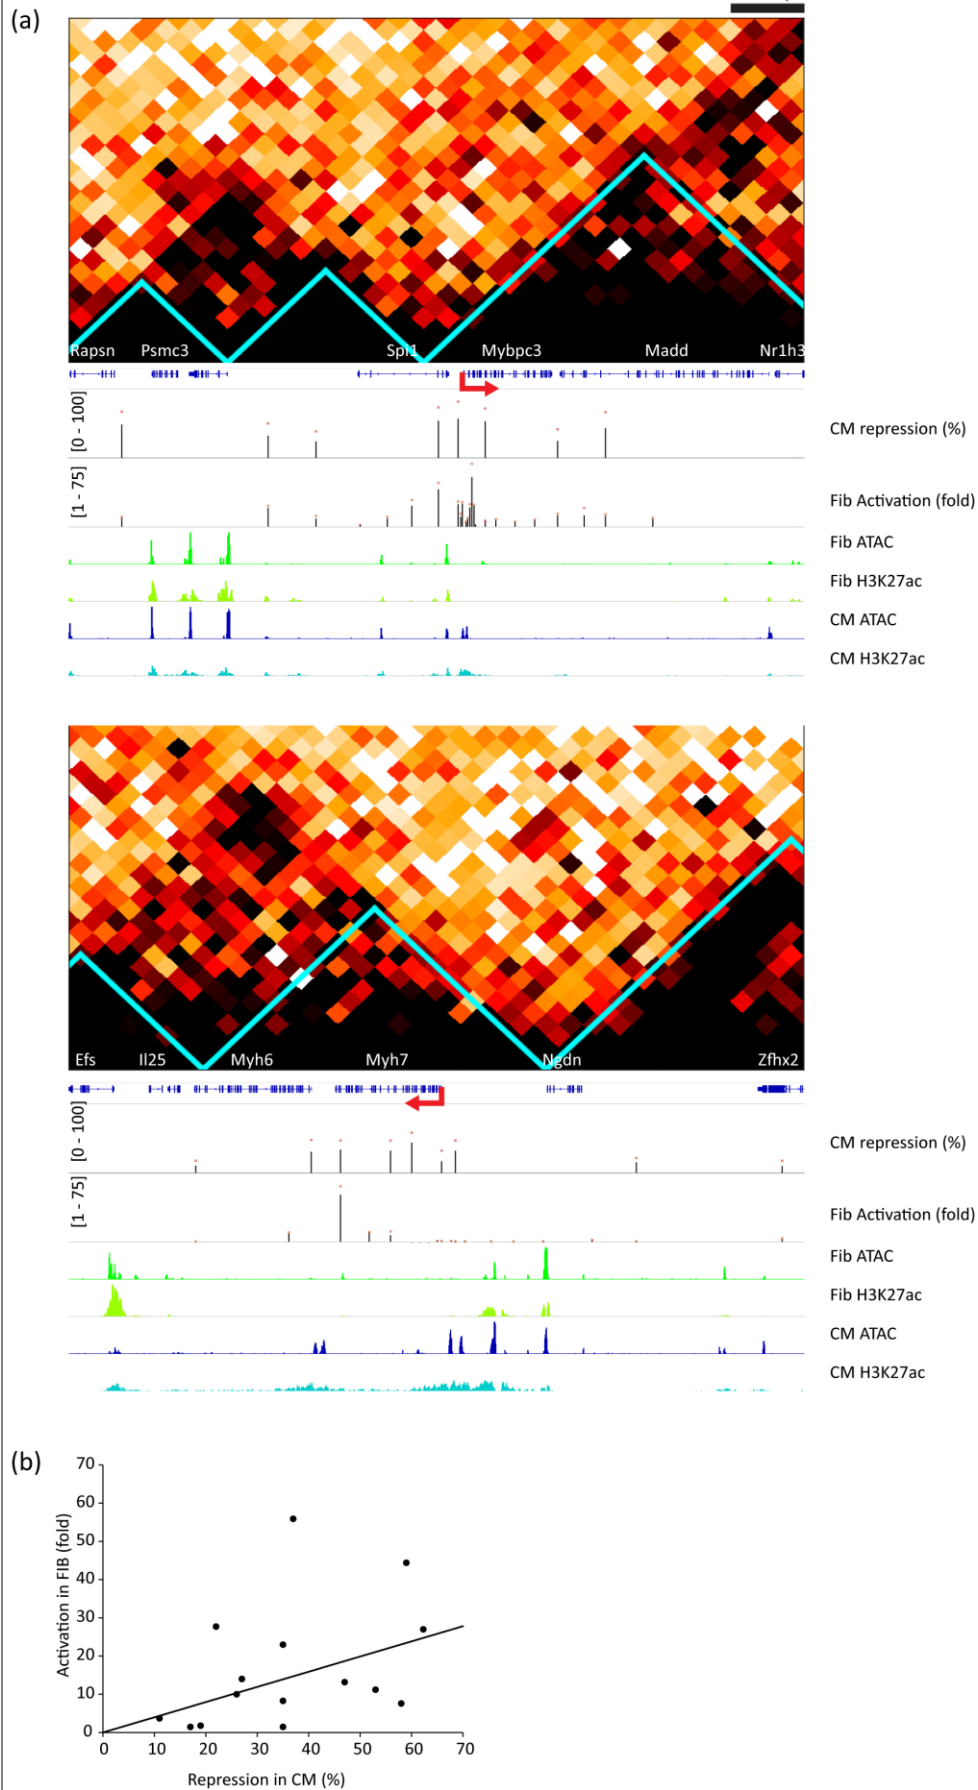



**Fig 5. Recruitment of repression domain represses gene expression in a distance dependent manner from multiple genomic loci.**

(a) Multi track diagrams of two cardiomyocyte specific gene loci (*Mybpc3*, *Myh7*) spanning 140 Kbp each. TSS of each gene is shown in red arrows. HiC maps for each locus are shown, with aqua colored lines indicating insulation boundaries. Tracks showing (from top to bottom): The genomic track with exons and introns in blue; Repression track showing index gene % repression in CM following dCas9-KRAB targeting to the genomic site with targeting vs. non-targeting gRNA control, as measured by RT-qPCR normalized to *Gapdh* (Scale of repression 0-100% in square brackets, average % repression from each gRNA site in black bars, red dots over bars indicate standard error, only bars with  $p < 0.05$  vs. control are shown,  $n=3$ ). Activation track showing the same index gene activation in FIB following dCas9-VPR targeting to the genomic site vs. non-targeting gRNA control, as measured by RT-qPCR normalized to *Gapdh* in (Scale of activation for the track is shown in square brackets, average fold activation from each gRNA site in black bars, red dots over bars indicate standard error, only bars with  $p < 0.05$  vs. control are shown,  $n=3$ ). ATAC-seq and H3K27ac ChIP-seq tracks are shown for FIB in green and CM in blue. Diagram shows that like activation, the repression can be achieved at a distance, by targeting non regulatory chromatin, and can cross insulation boundaries. (b) Scatter plot of gene fold activation in FIB by dCas9-VPR as a function of % repression by dCas9-KRAB in CM as measured by RT-qPCR for multiple gRNA targeting sites in the *Mybpc3* and *Myh7* loci. Each dot represents the average of  $n=3$  measurements in CM and FIB. Plot show activation and repression from these sites are generally correlated. A linear regression line is shown (Spearman's Rho 0.34,  $n=17$ ).

296

297

Figure 6

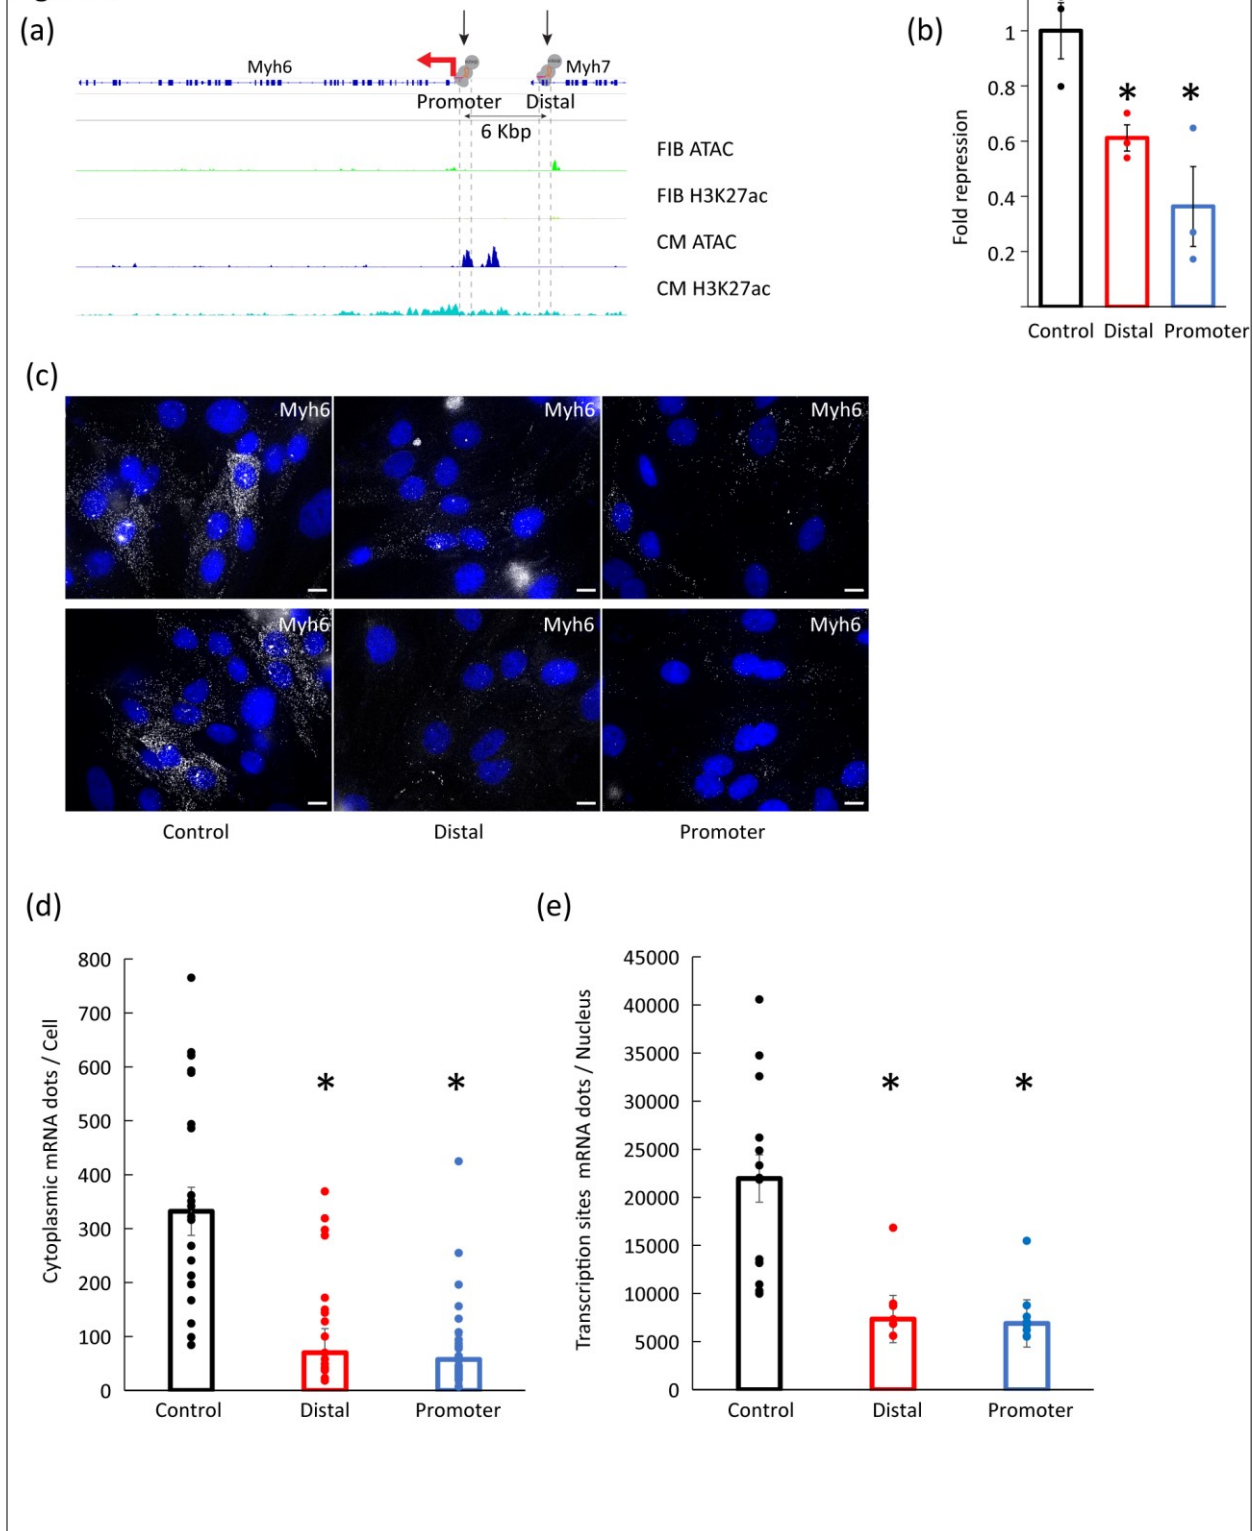

298

299

**Fig. 6. Repressor domain recruitment to distal non-functional genomic region in CM downregulates gene expression by inhibition of transcription.**

(a) Multi track diagram of *Myh6* gene locus, with the TSS of *Myh6* gene marked by red arrow. Tracks showing (from top to bottom): The genomic track with exons and introns in blue; ATAC-seq and H3K27ac ChIP-seq tracks are shown for FIB in greens and CM in blue. dCas9-KRAB was recruited by specific gRNAs to either the *Myh6* promoter or to a 6 Kbp upstream distal site, marked by black arrows and cross-hatched lines. The distal site lacks ATAC open chromatin marks. (b) Assessment of *Myh6* gene repression following targeting of either the distal or promoter sites compared to non-targeting gRNA control by RT-qPCR normalized to *Gapdh* showing that recruitment of dCas9-KRAB to either site can significantly repress *Myh6* expression (bars show mean  $\pm$ SE, n=3, \*p<0.05). (c) Representative smFISH images of *Myh6* mRNA in CM show reduced cytoplasmic signal of mature mRNA, and reduced nuclear spots indicating transcription sites in CMs transduced with dCas9-KRAB recruited to either the distal or promoter regions (smFISH signal in white, Nuclei DAPI signal in blue, scale bar = 10  $\mu$ m). (d) Quantification of cytoplasmic smFISH signal showing reduced mRNA levels when targeting either the distal or the promoter sites (n=20-30 cells, N=3 biologic replicates, \*p<0.001) (e) Quantification of transcription sites smFISH signal indicating reduced mRNA transcription rate when targeting either the distal or the promoter sites (n=7-15 cells, N=3 biological replicates, \*p<0.001).

300

301 **Discussion**

302 We examined whether recruitment of transcription factor effector domains to arbitrary genomic  
303 sites is sufficient to establish a CRE at that site. We studied the epigenetic and transcriptional  
304 consequences of such recruitment as well as the effects of distance from a distal gene on the  
305 transcriptional output. We show that activation domain recruitment to naïve genomic sites, devoid  
306 of open chromatin or active enhancer chromatin marks, results in acquisition of such active  
307 histone marks both at the targeted site, the distant gene promoter, and in induction of distant gene  
308 expression. The distance between the enhancer and the cognate gene affects its strength non-  
309 linearly. Repression behaved in a similar manner to activation, and the targeting of non-regulatory  
310 regions could repress gene expression from a distance with a non-linear distance dependence  
311 and could cross chromatin contact insulation boundaries.

312 We tested two types of activator domain combinations – the VPR composed of the viral VP64 and  
313 Rta and of the p65 activation domains, and GNT- composed of *Gata4*, *Mkx2-5*, and *Tbx5*  
314 endogenous cardiac transcription factor activation domains, and both combinations could activate  
315 genes from a distant arbitrary genomic site. We also show that such activation domain recruitment  
316 to a distant site is sufficient to epigenetically mark both the distant site and the promoter with  
317 H3K27ac and H3K4me1. Likewise, the recruitment of the endogenous KRAB domain to an  
318 arbitrary site could repress a gene from a distance. The enhancer creation model suggests that  
319 certain transcription factors, termed pioneer factors, can bind to sequence specific motifs in

320 nucleosomal chromatin to initiate enhancer assembly (Siegel and Sisler, 1963). However, the  
321 minimal required molecular components for enhancer assembly and series of events leading to  
322 enhancer activation are not fully understood (Field and Adelman, 2020). Our data supports the  
323 general conclusion that the recruitment of effector- activation or repressor domains to an arbitrary  
324 genomic site is sufficient to establish a CRE (enhancer of repressor) in the site and control the  
325 expression of genes from a distance. With ~1600 transcription factors encoded in the mammalian  
326 genome (Lambert et al., 2018), and the enormous number of potential factor combinations it  
327 remains to be studied which domain or domain combination are sufficient. Nevertheless, as many  
328 effector domains can interact with the same general co-factor, co-regulator, or histone modifying  
329 enzyme (Frieze and Farnham, 2011), it is likely that the ability to control the expression of genes  
330 from a distance is a general feature of many transcription factor effector domains.

331 We functionally show for multiple loci that genes can be activated from a distance, but the degree  
332 of activation declines nonlinearly with the distance of the activation sites from the gene. An inverse  
333 relationship between distance and the activity of an enhancer was also observed in an imaging-  
334 based study that showed that increasing the distance between the enhancer and promoter in a  
335 reporter construct in flies from 6.5 to 9 Kbp reduced the size and the timing of transcriptional  
336 bursting with more than 50% reduction in the level of the total output (Yokoshi et al., 2020). An  
337 emerging model proposes that regulatory elements may have both an enhancer and promoter  
338 functions, as enhancers and promoters share many molecular features, and gene promoters can  
339 act as enhancers for other genes (Andersson and Sandelin, 2020; Arnold et al., 2013). Our data  
340 supports this model and shows that an activation domain complex that serves as a strong  
341 promoter can exert a transcriptional control as it is moved further from the gene, albeit with a non-  
342 linear loss of activity. We observed an inverse distance - activation relationship in all the six loci  
343 studied, but there were inter- and intra-loci variability in the degree of activation and in the effect  
344 of distance. It is likely that additional layers of complexity beyond the chromatin accessibility,  
345 H3K27 acetylation, and chromatin three-dimensional contacts we examined in these loci  
346 contributes to the variability. Such factors include DNA methylation, additional histone  
347 modifications, non-coding RNAs, as well as additional recruitment of coactivators and co-  
348 repressors to sites in these loci. It is also likely that some of the variability is due to variation in  
349 the gRNA on-target efficiency in recruiting dCas9.

350 We show that activation can cross chromatin insulation boundaries. The role of TADs in mediating  
351 enhancer-promoter functional relationships is not entirely clear, and ablation of TAD structure can  
352 sometimes have minor effect on gene expression and enhancer activity for most genes (Akdemir

353 et al., 2020; Despang et al., 2019; Ghavi-Helm et al., 2019; Rao et al., 2017; Schwarzer et al.,  
354 2017; Williamson et al., 2019). The results of our study are also in line with a high-resolution  
355 promoter interaction analysis that showed that about a third of significant promoter-putative  
356 regulatory element interactions occurred across TAD boundaries (Javierre et al., 2016). TADs  
357 and insulation events are stochastic such that any specific locus is insulated in only a  
358 subpopulation of cells, and transcription is stochastic as well (Bohrer and Larson, 2021). We used  
359 smFISH to examine the repression of *Myh6* in individual cells and saw that while many cells were  
360 affected, there was a significant variability in the degree of repression between individual cells  
361 (Fig. 6). It is therefore quite possible that most of the activation or repression effect we measure  
362 comes from the subpopulation cells in which little or no insulation was occurring.

363 Previous CRISPRa and CRISPRi studies were focused on the developed of the tools, showed  
364 that genes can be activated or repressed by targeting their promoter or their enhancers, and  
365 demonstrated that regulatory elements can be identified by tiling assays (Chavez et al., 2016;  
366 Cheng et al., 2013; Fulco et al., 2016; Gilbert et al., 2014, 2013; Kearns et al., 2014; Klann et al.,  
367 2017; Konermann et al., 2015; Lin et al., 2015; Maeder et al., 2013; Mali et al., 2013; Perez-Pinera  
368 et al., 2013; Simeonov et al., 2017; Tanenbaum et al., 2014; Xie et al., 2017). Here our aim was  
369 different, and we used CRISPRa and CRISPRi to identify the requirements and consequences of  
370 *de novo* CRE generation, and to identify the effects of the position of the CRE on the  
371 transcriptional output of distant genes. In addition to addressing these questions, our study has  
372 important implications for the use and interpretation of CRISPRa and CRISPRi experiments. In  
373 agreement with the previous studies, we found that for most loci the strongest activation and  
374 repression was achieved by targeting genes from sites near their TSS. Yet, activation at levels  
375 that are comparable to those achieved in previous studies that targeted gene promoters (Cheng  
376 et al., 2013; Li et al., 2020; Maeder et al., 2013; Mali et al., 2013; Perez-Pinera et al., 2013;  
377 Tanenbaum et al., 2014), could also be achieved at a distance. Therefore, one implication of our  
378 study is that multiple gRNA sites can be tried when aiming to activate or repress a gene, including  
379 sites that are not inside proximal promoters. We also show that the ability to activate or repress a  
380 gene from a distant site does not necessarily indicate that the targeted site is an endogenous  
381 regulator.

382 In summary, using an unbiased approach we show here that recruitment of effector domains to a  
383 single naïve genomic site can control the expression of a distant gene. When the distance  
384 between the enhancer and the promoter increases, the enhancer's activity decreases. We  
385 speculate that cells overcome this limitation by combining multiple sites to form a larger and

386 stronger enhancers (Hnisz et al., 2013), and by combining multiple enhancers to control each  
387 gene.

388

## 389 **Material and methods**

### 390 **Cell Culture**

391 Primary cultures of neonatal rat ventricular cardiomyocytes (CM) were isolated as previously  
392 described using the neonatal cardiomyocyte isolation system (Worthington Biochemical  
393 Corporation) from 1-3 day old Fischer rat pups (Golan-Lagziel et al., 2018). Cardiomyocyte  
394 fraction was purified by density centrifugation in Percoll (Sigma-Aldrich, St. Louis, MO) gradient.  
395  $3 \times 10^6$  live cardiomyocytes were plated on 10cm dishes or 6 well plates, pre-coated with Cultrex  
396 Basement Membrane Extract (BME; Trevigen) diluted with serum-free DMEM. The culture  
397 medium was replaced 24h after plating with serum free medium and cultured for an additional 48  
398 hrs. Fischer rat fibroblasts (FIB) were acquired from ATCC (Rat2, CRL-1764). All animal  
399 experiments were performed in compliance with relevant laws and institutional guidelines and  
400 approved by the local animal ethics committees of the Technion, Israel Institute of Technology.

### 401 **gRNA synthesis**

402 The CRISPOR tool (Concordet and Haeussler, 2018) was used to choose appropriate and  
403 specific gRNA target sites closed to each mapping point. The single strand DNA oligonucleotide  
404 templates were acquired from Integrated DNA Technologies (IDT). Guide RNAs were in-vitro  
405 synthesized using Engen gRNA synthesis Kit (New England Biolabs) according to the  
406 manufacturer instruction with synthesis of the double stranded DNA template and transcription of  
407 RNA in a single reaction. Guide RNAs were then purified using Monarch RNA Cleanup Kit (New  
408 England Biolabs T2040L) per manufacturer instructions.

### 409 **Plasmids and transfections**

410 Plasmids containing dCas9-VPR (SP-dCas9-VPR was a gift from George Church (Addgene  
411 plasmid # 63798 ; <http://n2t.net/addgene:63798> ; RRID:Addgene\_63798)) (Chavez et al., 2015),  
412 dCas9-KRAB domain (pLV hU6-sgRNA hUbC-dCas9-KRAB-T2a-Puro was a gift from Charles  
413 Gersbach (Addgene plasmid # 71236 ; <http://n2t.net/addgene:71236> ; RRID:Addgene\_71236))  
414 (Thakore et al., 2015) were acquired from Addgene.

415 FIBs were transfected with dCas9-VPR construct 24 hours post plating on 6 well plates using  
416 Polyjet transfection reagent (Bioconsult SL100688) per manufacturer instructions. 48 hours post  
417 cell plating, sgRNAs were transfected using Lipofectaimine RNAiMAX transfection reagent  
418 (Thermofisher) per manufacturer instructions.

#### 419 **Adenovirus production**

420 The dCas9-KRAB fragment was inserted into pEnt3c (Thermofisher) using HiFi DNA assembly  
421 (New England Biolabs), followed by Gateway LR Clonase (Thermofisher) reaction delivery into  
422 pAd-V5 Gateway Adenovirus destination vector (Thermofisher). Viral production and amplification  
423 in HEK293 cells as previously described (Golan-Lagziel et al., 2018).

424 *Gata4-Nkx2-5-Tbx5* (GNT) activation domains (Mus musculus GATA4 amino acids 2-75, NKX2-  
425 5 amino acid 18-129, and Homo sapiens TBX5 amino acid 339-379) and were acquired as a gene  
426 block from Integrated DNA Technologies (IDT). GNT fragment was inserted into dCas9 vector  
427 using NEBuilder HiFi DNA assembly (NEB-E2621L). The dCas9-GNT fragment was inserted into  
428 pEnt3c (Thermofisher) using HiFi DNA assembly (New England Biolabs), followed by Gateway  
429 LR Clonase (Thermofisher) reaction delivery into pAd-V5 Gateway Adenovirus destination vector  
430 (Thermofisher). Viral production and amplification in HEK293 cells as previously described  
431 (Golan-Lagziel et al., 2018).

432 CM were transduced with adenoviral vectors 24 hours post plating, followed by transfection of a  
433 single sgRNA 48 hrs post plating using Lipofectaimine RNAiMAX transfection reagent  
434 (Thermofisher).

#### 435 **RNA extraction, cDNA synthesis and qPCR**

436 RNA was extracted using NucleoSpin RNA extraction kit (Macherey-Nagel) according to the  
437 manufacturer instructions. FIB and CM RNA was extracted following dCas9-VPR and gRNA  
438 transfection, 72 hours post cell plating. Reverse transcription to cDNA was performed using all-  
439 in-one RT Mastermix (abm). The qPCR was performed using the Bio-Rad CFX90 thermocycler  
440 and SYBRgreen Master Mix (Rhenium AB-4385612) using gene specific primers and expression  
441 was normalized to *Gapdh*. Technical duplicates were used for each reaction in addition to the  
442 biological replicates. For sgRNA transfection experiments, negative control samples were treated  
443 with non-targeting sgRNA.

444 Primers used:

| Species | Gene          | Forward Primer 5' → 3' | Reverse Primer 5' → 3' |
|---------|---------------|------------------------|------------------------|
| Rat     | <i>Myh7</i>   | CCGAGTCCCAGGTCAACAAG   | ACTCTTCATTCAGGCCCTTGG  |
| Rat     | <i>Gapdh</i>  | GACATGCCGCCTGGAGAAAC   | AGCCCAGGATGCCCTTTAGT   |
| Rat     | <i>Myh6</i>   | GCGCCAAGCAGAAAATGCAC   | TGTGGGATAGCAACAGCGAG   |
| Rat     | <i>Tnni1</i>  | TCATCTGCACAGGAACCAACA  | TCAGGCTCTTCAGCATGAGTT  |
| Rat     | <i>Rcan1</i>  | TGCGAGTGAGTGAGTCGTTC   | AATTTGGCCCTGGTCTCACT   |
| Rat     | <i>Mybpc3</i> | TCCGGAGGGACTCAAAGCTA   | TTCATCGTGCTTCATGCCCT   |
| Rat     | <i>Cox6a2</i> | GCTTAACTGCTGGATGCACG   | AGAAGGGCTTGTTCCGGATG   |

445

#### 446 **RNA Single Molecule Fluorescence In-Situ Hybridization (smFISH)**

447 Probe libraries were purchased from Biosearch Technologies as previously described (Lewis et  
448 al., 2018). Cells were washed with PBS, then fixed with a solution containing 3.5% formaldehyde  
449 and washed with a buffer containing 10% formamide (deionized; Sigma). Hybridization was  
450 performed in a buffer containing 10% formamide, 10% dextran sulphate, 2X SSC and desired  
451 probe at a concentration of 125 nM. Hybridization was done overnight in a humidified chamber at  
452 37°C. Following hybridization, cells were washed twice with 10% formamide wash buffer for 30  
453 min. Second wash was supplemented with 4',6-diamidino-2-phenylindole dihydrochloride (DAPI)  
454 at a concentration of 1µg/ml for nuclear staining. Cells were then washed once with 2X SSC for  
455 5 minutes and mounted on glass slides with 12 µl of Fluoromount-G (ThermoFisher Scientific), or  
456 with glucose oxidase – catalase anti-fade solution in case of Alexa-647 or Quasar-670 probe  
457 libraries. Slides were imaged with Axio Observer inverted fluorescent microscope (Zeiss) using  
458 an X-cite metal-halide light source and a high-resolution camera (Hamamtsu Orca R2), with an  
459 X63/1.4NA objective (Olympus). Exposure times for smFISH signal was between 300-600ms.  
460 Images were captured as a full thickness z-stack with a 0.24-0.30 µm section size. For qualitative  
461 analysis resulting images were imported into ImageJ, a Laplacian of Gaussian filter was applied  
462 to the smFISH channel using the LoG3D plugin, and a max intensity merge of the z-stack was  
463 acquired. Quantification of smFISH was performed using the FISH-quant MATLAB toolbox  
464 (Mueller et al., 2013).

#### 465 **Chip-qPCR**

466 Chromatin immunoprecipitation (ChIP) was performed by using MAGnify Chromatin  
467 Immunoprecipitation System (Invitrogen) with anti-Histone 3 acetyl K27 (H3K27ac) antibody  
468 (Abcam ab4729) and anti-Histone 3 k4 monomethyl (H3k4mm) (Abcam ab8895). Input controls



469 were non-immune precipitated samples. ChIP- qPCR was done using a Bio-Rad CFX96  
470 thermocycler. Data were calculated as a fraction of input chromatin.

## 471 **Hi-C**

472 Hi-C was performed as described previously (Belaghzal et al., 2017). Briefly,  $\sim 10^6$  cells were  
473 cross-linked with formaldehyde, permeabilized and digested with DpnII. Next, sticky ends were  
474 filled with nucleotides including biotinylated dATP, followed by blunt-end ligation, cross-link  
475 reversal and DNA purification. This was followed by biotin removal from unligated ends,  
476 sonication, and pulldown of biotinylated fragments with streptavidin beads. Finally, the library was  
477 amplified, size selected and sequenced using 75bp paired-end sequencing on a NextSeq500.

478 The resulting 525,411,183 paired-end reads were processed as described previously (Lajoie et  
479 al., 2015). Briefly, read ends were independently iteratively mapped to DpnII restriction fragments  
480 based on the rat rn6 genome using bowtie2 (Langmead and Salzberg, 2012). The mapped reads  
481 were then filtered for artifacts and duplications, finally resulting in 285,170,763 valid unique read  
482 pairs. Valid read pairs were then binned into matrices, and the interaction matrices were filtered  
483 and balanced using Cooler (Abdennur and Mirny, 2020).

484 Insulation score was calculated following an approach previously described (Crane et al., 2015b),  
485 with slight modifications. Using 5kb bin resolution, the insulation score of position x was calculated  
486 as the mean of the square of all interaction frequencies between loci 100kb downstream with  
487 100kb upstream of x. Discrete TAD boundaries were called using Scipy (Virtanen et al., 2020).

488 `scipy.signal.find_peaks(insulation_score,prominence=0.00001,width=2)`.

## 489 **Statistics and informatic analysis**

490 Most analysis steps are outlined in the text. Student's two tailed t-test was used to compare the  
491 means of two groups unless otherwise specified. Analysis was performed using R (R Core Team  
492 (2016). R: A language and environment for statistical computing. R Foundation for Statistical  
493 Computing, Vienna, Austria. URL <https://www.R-project.org/> . HOMER annotatePeaks.pl was  
494 used for heatmap generation (Heinz et al., 2010). Estimated p values in the figures are result of  
495 double sided, unpaired t-student test, unless otherwise stated.

## 496 **Data Availability**

497 GSE102532

## 498 **Funding**

499 IK was supported by the Israel Science Foundation (grant # 1385/20). NK was supported by the  
500 Azrieli Faculty Fellows program and Israel Science Foundation (grant# 1479/18).

### 501 **Conflict of Interest statement**

502 The authors declare no conflicts of interest.

### 503 **References**

504 Abdennur N, Mirny LA. 2020. Cooler: Scalable storage for Hi-C data and other genomically  
505 labeled arrays. *Bioinformatics* **36**:311–316. doi:10.1093/bioinformatics/btz540

506 Akdemir KC, Le VT, Chandran S, Li Y, Verhaak RG, Beroukhim R, Campbell PJ, Chin L, Dixon  
507 JR, Futreal PA, Akdemir KC, Alvarez EG, Baez-Ortega A, Beroukhim R, Boutros PC,  
508 Bowtell DDL, Brors B, Burns KH, Campbell PJ, Chan K, Chen K, Cortés-Ciriano I, Dueso-  
509 Barroso A, Dunford AJ, Edwards PA, Estivill X, Etemadmoghadam D, Feuerbach L, Fink  
510 JL, Frenkel-Morgenstern M, Garsed DW, Gerstein M, Gordenin DA, Haan D, Haber JE,  
511 Hess JM, Hutter B, Imielinski M, Jones DTW, Ju YS, Kazanov MD, Klimczak LJ, Koh Y,  
512 Korbel JO, Kumar K, Lee EA, Lee JJK, Li Y, Lynch AG, Macintyre G, Markowitz F,  
513 Martincorena I, Martinez-Fundichely A, Meyerson M, Miyano S, Nakagawa H, Navarro  
514 FCP, Ossowski S, Park PJ, Pearson J V., Puiggròs M, Rippe K, Roberts ND, Roberts SA,  
515 Rodriguez-Martin B, Schumacher SE, Scully R, Shackleton M, Sidiropoulos N, Sieverling L,  
516 Stewart C, Torrents D, Tubio JMC, Villasante I, Waddell N, Wala JA, Weischenfeldt J,  
517 Yang L, Yao X, Yoon SS, Zamora J, Zhang CZ. 2020. Disruption of chromatin folding  
518 domains by somatic genomic rearrangements in human cancer. *Nat Genet* **52**:294–305.  
519 doi:10.1038/s41588-019-0564-y

520 Andersson R, Sandelin A. 2020. Determinants of enhancer and promoter activities of regulatory  
521 elements. *Nat Rev Genet*. doi:10.1038/s41576-019-0173-8

522 Arnold CD, Gerlach D, Stelzer C, Boryń ŁM, Rath M, Stark A. 2013. Genome-wide quantitative  
523 enhancer activity maps identified by STARR-seq. *Science (80- )* **339**:1074–1077.  
524 doi:10.1126/science.1232542

525 Bahar Halpern K, Tanami S, Landen S, Chapal M, Szlak L, Hutzler A, Nizhberg A, Itzkovitz S,  
526 Halpern K, Tanami S, Landen S, Chapal M, Szlak L. 2015. Bursty gene expression in the  
527 intact mammalian liver. *Mol Cell* **58**:147–56. doi:10.1016/j.molcel.2015.01.027

528 Belaghzal H, Dekker J, Gibcus JH. 2017. Hi-C 2.0: An optimized Hi-C procedure for high-

- 529 resolution genome-wide mapping of chromosome conformation. *Methods* **123**:56–65.  
530 doi:10.1016/j.ymeth.2017.04.004
- 531 Bohrer CH, Larson DR. 2021. The Stochastic Genome and Its Role in Gene Expression. *Cold*  
532 *Spring Harb Perspect Biol* **13**:a040386. doi:10.1101/cshperspect.a040386
- 533 Chavez A, Scheiman J, Vora S, Pruitt BW, Tuttle M, P R Iyer E, Lin S, Kiani S, Guzman CD,  
534 Wiegand DJ, Ter-Ovanesyan D, Braff JL, Davidsohn N, Housden BE, Perrimon N, Weiss  
535 R, Aach J, Collins JJ, Church GM. 2015. Highly efficient Cas9-mediated transcriptional  
536 programming. *Nat Methods* **12**:326–8. doi:10.1038/nmeth.3312
- 537 Chavez A, Tuttle M, Pruitt BW, Ewen-Campen B, Chari R, Ter-Ovanesyan D, Haque SJ, Cecchi  
538 RJ, Kowal EJK, Buchthal J, Housden BE, Perrimon N, Collins JJ, Church G. 2016.  
539 Comparison of Cas9 activators in multiple species. *Nat Methods* **13**:563–567.  
540 doi:10.1038/nmeth.3871
- 541 Cheng AW, Wang H, Yang H, Shi L, Katz Y, Theunissen TW, Rangarajan S, Shivalila CS,  
542 Dadon DB, Jaenisch R. 2013. Multiplexed activation of endogenous genes by CRISPR-on,  
543 an RNA-guided transcriptional activator system. *Cell Res* **23**:1163–1171.  
544 doi:10.1038/cr.2013.122
- 545 Concordet JP, Haeussler M. 2018. CRISPOR: Intuitive guide selection for CRISPR/Cas9  
546 genome editing experiments and screens. *Nucleic Acids Res* **46**:W242–W245.  
547 doi:10.1093/nar/gky354
- 548 Crane E, Bian Q, McCord RP, Lajoie BR, Wheeler BS, Ralston EJ, Uzawa S, Dekker J, Meyer  
549 BJ. 2015a. Condensin-driven remodelling of X chromosome topology during dosage  
550 compensation. *Nature* **523**:240–244. doi:10.1038/nature14450
- 551 Crane E, Bian Q, McCord RP, Lajoie BR, Wheeler BS, Ralston EJ, Uzawa S, Dekker J, Meyer  
552 BJ. 2015b. Condensin-driven remodelling of X chromosome topology during dosage  
553 compensation. *Nature* **523**:240–244. doi:10.1038/nature14450
- 554 Creighton MP, Cheng AW, Welstead GG, Kooistra T, Carey BW, Steine EJ, Hanna J, Lodato  
555 MA, Frampton GM, Sharp PA, Boyer LA, Young RA, Jaenisch R. 2010. Histone H3K27ac  
556 separates active from poised enhancers and predicts developmental state. *Proc Natl Acad*  
557 *Sci U S A* **107**:21931–6. doi:10.1073/pnas.1016071107
- 558 Despang A, Schöpflin R, Franke M, Ali S, Jerković I, Paliou C, Chan WL, Timmermann B,

- 559 Wittler L, Vingron M, Mundlos S, Ibrahim DM. 2019. Functional dissection of the Sox9–  
560 Kcnj2 locus identifies nonessential and instructive roles of TAD architecture. *Nat Genet*  
561 **51**:1263–1271. doi:10.1038/s41588-019-0466-z
- 562 Dixon JR, Selvaraj S, Yue F, Kim A, Li Y, Shen Y, Hu M, Liu JS, Ren B. 2012. Topological  
563 domains in mammalian genomes identified by analysis of chromatin interactions. *Nature*  
564 **485**:376–380. doi:10.1038/nature11082
- 565 Field A, Adelman K. 2020. Evaluating Enhancer Function and Transcription. *Annu Rev*  
566 *Biochem*. doi:10.1146/annurev-biochem-011420-095916
- 567 Fietze S, Farnham PJ. 2011. Transcription factor effector domains. *Subcell Biochem* **52**:261–  
568 277. doi:10.1007/978-90-481-9069-0\_12
- 569 Fulco CP, Munschauer M, Anyoha R, Munson G, Grossman SR, Perez EM, Kane M, Cleary B,  
570 Lander ES, Engreitz JM. 2016. Systematic mapping of functional enhancer-promoter  
571 connections with CRISPR interference. *Science (80- )* **354**:769–773.  
572 doi:10.1126/science.aag2445
- 573 Fulco CP, Nasser J, Jones TR, Munson G, Bergman DT, Subramanian V, Grossman SR,  
574 Anyoha R, Doughty BR, Patwardhan TA, Nguyen TH, Kane M, Perez EM, Durand NC,  
575 Lareau CA, Stamenova EK, Aiden EL, Lander ES, Engreitz JM. 2019. Activity-by-contact  
576 model of enhancer–promoter regulation from thousands of CRISPR perturbations. *Nat*  
577 *Genet*. doi:10.1038/s41588-019-0538-0
- 578 Gao X, Tsang JCH, Gaba F, Wu D, Lu L, Liu P. 2014. Comparison of TALE designer  
579 transcription factors and the CRISPR/dCas9 in regulation of gene expression by targeting  
580 enhancers. *Nucleic Acids Res* **42**. doi:10.1093/nar/gku836
- 581 Ghavi-Helm Y, Jankowski A, Meiers S, Viales RR, Korbelt JO, Furlong EEM. 2019. Highly  
582 rearranged chromosomes reveal uncoupling between genome topology and gene  
583 expression. *Nat Genet* **51**:1272–1282. doi:10.1038/s41588-019-0462-3
- 584 Gilbert LA, Horlbeck MA, Adamson B, Villalta JE, Chen Y, Whitehead EH, Guimaraes C,  
585 Panning B, Ploegh HL, Bassik MC, Qi LS, Kampmann M, Weissman JS. 2014. Genome-  
586 Scale CRISPR-Mediated Control of Gene Repression and Activation. *Cell* **159**:647–661.  
587 doi:10.1016/j.cell.2014.09.029
- 588 Gilbert LA, Larson MH, Morsut L, Liu Z, Brar GA, Torres SE, Stern-Ginossar N, Brandman O,

- 589 Whitehead EH, Doudna JA, Lim WA, Weissman JS, Qi LS. 2013. CRISPR-mediated  
590 modular RNA-guided regulation of transcription in eukaryotes. *Cell* **154**:442.  
591 doi:10.1016/j.cell.2013.06.044
- 592 Golan-Lagziel T, Lewis YE, Shkedi O, Douvdevany G, Caspi LH, Kehat I. 2018. Analysis of rat  
593 cardiac myocytes and fibroblasts identifies combinatorial enhancer organization and  
594 transcription factor families. *J Mol Cell Cardiol* **116**:91–105.  
595 doi:10.1016/j.yjmcc.2018.02.003
- 596 Heinz S, Benner C, Spann N, Bertolino E, Lin YC, Laslo P, Cheng JX, Murre C, Singh H, Glass  
597 CK. 2010. Simple combinations of lineage-determining transcription factors prime cis-  
598 regulatory elements required for macrophage and B cell identities. *Mol Cell* **38**:576–89.  
599 doi:10.1016/j.molcel.2010.05.004
- 600 Hilton IB, D’Ippolito AM, Vockley CM, Thakore PI, Crawford GE, Reddy TE, Gersbach CA.  
601 2015. Epigenome editing by a CRISPR-Cas9-based acetyltransferase activates genes  
602 from promoters and enhancers. *Nat Biotechnol* **33**:510–517. doi:10.1038/nbt.3199
- 603 Hnisz D, Abraham BJ, Lee TI, Lau A, Saint-André V, Sigova AA, Hoke HA, Young RA. 2013.  
604 Super-Enhancers in the Control of Cell Identity and Disease. *Cell* **155**:934–947.  
605 doi:10.1016/j.cell.2013.09.053
- 606 Javierre BM, Sewitz S, Cairns J, Wingett SW, Várnai C, Thiecke MJ, Freire-Pritchett P,  
607 Spivakov M, Fraser P, Burren OS, Cutler AJ, Todd JA, Wallace C, Wilder SP, Kreuzhuber  
608 R, Kostadima M, Zerbino DR, Stegle O, Burden F, Farrow S, Rehnström K, Downes K,  
609 Grassi L, Ouwehand WH, Frontini M, Hill SM, Wang F, Stunnenberg HG, Martens JH, Kim  
610 B, Sharifi N, Janssen-Megens EM, Yaspo ML, Linser M, Kovacsovics A, Clarke L,  
611 Richardson D, Datta A, Flicek P. 2016. Lineage-Specific Genome Architecture Links  
612 Enhancers and Non-coding Disease Variants to Target Gene Promoters. *Cell* **167**:1369-  
613 1384.e19. doi:10.1016/j.cell.2016.09.037
- 614 Kearns NA, Genga RMJ, Enuameh MS, Garber M, Wolfe SA, Maehr R. 2014. Cas9 effector-  
615 mediated regulation of transcription and differentiation in human pluripotent stem cells. *Dev*  
616 **141**:219–223. doi:10.1242/dev.103341
- 617 Klann TS, Black JB, Chellappan M, Safi A, Song L, Hilton IB, Crawford GE, Reddy TE,  
618 Gersbach CA. 2017. CRISPR-Cas9 epigenome editing enables high-throughput screening  
619 for functional regulatory elements in the human genome. *Nat Biotechnol* **35**:561–568.

- 620 doi:10.1038/nbt.3853
- 621 Konermann S, Brigham MD, Trevino AE, Joung J, Abudayyeh OO, Barcena C, Hsu PD, Habib  
622 N, Gootenberg JS, Nishimasu H, Nureki O, Zhang F. 2015. Genome-scale transcriptional  
623 activation by an engineered CRISPR-Cas9 complex. *Nature* **517**:583–588.  
624 doi:10.1038/nature14136
- 625 Lajoie BR, Dekker J, Kaplan N. 2015. The Hitchhiker’s guide to Hi-C analysis: Practical  
626 guidelines. *Methods* **72**:65–75. doi:10.1016/j.ymeth.2014.10.031
- 627 Lambert SA, Jolma A, Campitelli LF, Das PK, Yin Y, Albu M, Chen X, Taipale J, Hughes TR,  
628 Weirauch MT. 2018. The Human Transcription Factors. *Cell*. doi:10.1016/j.cell.2018.01.029
- 629 Langmead B, Salzberg SL. 2012. Fast gapped-read alignment with Bowtie 2. *Nat Methods*  
630 **9**:357–359. doi:10.1038/nmeth.1923
- 631 Lewis YE, Moskovitz A, Mutlak M, Heineke J, Caspi LH, Kehat I. 2018. Localization of  
632 transcripts, translation, and degradation for spatiotemporal sarcomere maintenance. *J Mol*  
633 *Cell Cardiol* **116**:16–28. doi:10.1016/j.yjmcc.2018.01.012
- 634 Li K, Liu Y, Cao H, Zhang Y, Gu Z, Liu X, Yu A, Kaphle P, Dickerson KE, Ni M, Xu J. 2020.  
635 Interrogation of enhancer function by enhancer-targeting CRISPR epigenetic editing. *Nat*  
636 *Commun* **11**. doi:10.1038/s41467-020-14362-5
- 637 Lin S, Ewen-Campen B, Ni X, Housden BE, Perrimon N. 2015. In vivo transcriptional activation  
638 using CRISPR/Cas9 in *Drosophila*. *Genetics* **201**:433–442.  
639 doi:10.1534/genetics.115.181065
- 640 Local A, Huang H, Albuquerque CP, Singh N, Lee AY, Wang W, Wang C, Hsia JE, Shiau AK,  
641 Ge K, Corbett KD, Wang D, Zhou H, Ren B. 2018. Identification of H3K4me1-associated  
642 proteins at mammalian enhancers. *Nat Genet* **50**:73–82. doi:10.1038/s41588-017-0015-6
- 643 Lupiáñez DG, Kraft K, Heinrich V, Krawitz P, Brancati F, Klopocki E, Horn D, Kayserili H, Opitz  
644 JM, Laxova R, Santos-Simarro F, Gilbert-Dussardier B, Wittler L, Borschiwer M, Haas SA,  
645 Osterwalder M, Franke M, Timmermann B, Hecht J, Spielmann M, Visel A, Mundlos S.  
646 2015. Disruptions of topological chromatin domains cause pathogenic rewiring of gene-  
647 enhancer interactions. *Cell* **161**:1012–1025. doi:10.1016/j.cell.2015.04.004
- 648 Maeder ML, Linder SJ, Cascio VM, Fu Y, Ho QH, Joung JK. 2013. CRISPR RNA-guided  
649 activation of endogenous human genes. *Nat Methods* **10**:977–979.

- 650 doi:10.1038/nmeth.2598
- 651 Mali P, Aach J, Stranges PB, Esvelt KM, Moosburner M, Kosuri S, Yang L, Church GM. 2013.  
652 CAS9 transcriptional activators for target specificity screening and paired nickases for  
653 cooperative genome engineering. *Nat Biotechnol* **31**:833–838. doi:10.1038/nbt.2675
- 654 McCord RP, Kaplan N, Giorgetti L. 2020. Chromosome Conformation Capture and Beyond:  
655 Toward an Integrative View of Chromosome Structure and Function. *Mol Cell*.  
656 doi:10.1016/j.molcel.2019.12.021
- 657 Morrissey EE, Ip HS, Tang Z, Parmacek MS. 1997. GATA-4 activates transcription via two novel  
658 domains that are conserved within the GATA-4/5/6 subfamily. *J Biol Chem* **272**:8515–8524.  
659 doi:10.1074/jbc.272.13.8515
- 660 Mueller F, Senecal A, Tantale K, Marie-Nelly H, Ly N, Collin O, Basyuk E, Bertrand E, Darzacq  
661 X, Zimmer C. 2013. FISH-quant: Automatic counting of transcripts in 3D FISH images. *Nat*  
662 *Methods*. doi:10.1038/nmeth.2406
- 663 Nora EP, Lajoie BR, Schulz EG, Giorgetti L, Okamoto I, Servant N, Piolot T, Van Berkum NL,  
664 Meisig J, Sedat J, Gribnau J, Barillot E, Blüthgen N, Dekker J, Heard E. 2012. Spatial  
665 partitioning of the regulatory landscape of the X-inactivation centre. *Nature* **485**:381–385.  
666 doi:10.1038/nature11049
- 667 Perez-Pinera P, Kocak DD, Vockley CM, Adler AF, Kabadi AM, Polstein LR, Thakore PI, Glass  
668 KA, Ousterout DG, Leong KW, Guilak F, Crawford GE, Reddy TE, Gersbach CA. 2013.  
669 RNA-guided gene activation by CRISPR-Cas9-based transcription factors. *Nat Methods*  
670 **10**:973–976. doi:10.1038/nmeth.2600
- 671 Ranganayakulu G, Elliott DA, Harvey RP, Olson EN. 1998. Divergent roles for NK-2 class  
672 homeobox genes in cardiogenesis in flies and mice. *Development* **125**:3037–3048.  
673 doi:10.1242/dev.125.16.3037
- 674 Rao SSP, Huang SC, Glenn St Hilaire B, Engreitz JM, Perez EM, Kieffer-Kwon KR, Sanborn  
675 AL, Johnstone SE, Bascom GD, Bochkov ID, Huang X, Shamim MS, Shin J, Turner D, Ye  
676 Z, Omer AD, Robinson JT, Schlick T, Bernstein BE, Casellas R, Lander ES, Aiden EL.  
677 2017. Cohesin Loss Eliminates All Loop Domains. *Cell* **171**:305-320.e24.  
678 doi:10.1016/j.cell.2017.09.026
- 679 Rosa-Garrido M, Chapski DJ, Vondriska TM. 2018. Epigenomes in Cardiovascular Disease.

- 680 *Circ Res.* doi:10.1161/CIRCRESAHA.118.311597
- 681 Schwarzer W, Abdennur N, Goloborodko A, Pekowska A, Fudenberg G, Loe-Mie Y, Fonseca  
682 NA, Huber W, Haering CH, Mirny L, Spitz F. 2017. Two independent modes of chromatin  
683 organization revealed by cohesin removal. *Nature* **551**:51–56. doi:10.1038/nature24281
- 684 Sexton T, Cavalli G. 2015. The role of chromosome domains in shaping the functional genome.  
685 *Cell.* doi:10.1016/j.cell.2015.02.040
- 686 Siegel MR, Sisler HD. 1963. Inhibition of protein synthesis in vitro by cycloheximide [13]. *Nature.*  
687 doi:10.1038/200675a0
- 688 Simeonov DR, Gowen BG, Boontanart M, Roth TL, Gagnon JD, Mumbach MR, Satpathy AT,  
689 Lee Y, Bray NL, Chan AY, Lituiev DS, Nguyen ML, Gate RE, Subramaniam M, Li Z, Woo  
690 JM, Mitros T, Ray GJ, Curie GL, Naddaf N, Chu JS, Ma H, Boyer E, Van Gool F, Huang H,  
691 Liu R, Tobin VR, Schumann K, Daly MJ, Farh KK, Ansel KM, Ye CJ, Greenleaf WJ,  
692 Anderson MS, Bluestone JA, Chang HY, Corn JE, Marson A. 2017. Discovery of  
693 stimulation-responsive immune enhancers with CRISPR activation. *Nature* **549**:111–115.  
694 doi:10.1038/nature23875
- 695 Tanenbaum ME, Gilbert LA, Qi LS, Weissman JS, Vale RD. 2014. A protein-tagging system for  
696 signal amplification in gene expression and fluorescence imaging. *Cell* **159**:635–646.  
697 doi:10.1016/j.cell.2014.09.039
- 698 Thakore PI, D'Ippolito AM, Song L, Safi A, Shivakumar NK, Kabadi AM, Reddy TE, Crawford  
699 GE, Gersbach CA. 2015. Highly specific epigenome editing by CRISPR-Cas9 repressors  
700 for silencing of distal regulatory elements. *Nat Methods* **12**:1143–1149.  
701 doi:10.1038/nmeth.3630
- 702 Virtanen P, Gommers R, Oliphant TE, Haberland M, Reddy T, Cournapeau D, Burovski E,  
703 Peterson P, Weckesser W, Bright J, van der Walt SJ, Brett M, Wilson J, Millman KJ,  
704 Mayorov N, Nelson ARJ, Jones E, Kern R, Larson E, Carey CJ, Polat İ, Feng Y, Moore  
705 EW, VanderPlas J, Laxalde D, Perktold J, Cimrman R, Henriksen I, Quintero EA, Harris  
706 CR, Archibald AM, Ribeiro AH, Pedregosa F, van Mulbregt P, Vijaykumar A, Bardelli A  
707 Pietro, Rothberg A, Hilboll A, Kloeckner A, Scopatz A, Lee A, Rokem A, Woods CN, Fulton  
708 C, Masson C, Häggström C, Fitzgerald C, Nicholson DA, Hagen DR, Pasechnik D V.,  
709 Olivetti E, Martin E, Wieser E, Silva F, Lenders F, Wilhelm F, Young G, Price GA, Ingold  
710 GL, Allen GE, Lee GR, Audren H, Probst I, Dietrich JP, Silterra J, Webber JT, Slavič J,



- 711 Nothman J, Buchner J, Kulick J, Schönberger JL, de Miranda Cardoso JV, Reimer J,  
712 Harrington J, Rodríguez JLC, Nunez-Iglesias J, Kuczynski J, Tritz K, Thoma M, Newville M,  
713 Kümmerer M, Bolingbroke M, Tartre M, Pak M, Smith NJ, Nowaczyk N, Shebanov N,  
714 Pavlyk O, Brodtkorb PA, Lee P, McGibbon RT, Feldbauer R, Lewis S, Tygier S, Sievert S,  
715 Vigna S, Peterson S, More S, Pudlik T, Oshima T, Pingel TJ, Robitaille TP, Spura T, Jones  
716 TR, Cera T, Leslie T, Zito T, Krauss T, Upadhyay U, Halchenko YO, Vázquez-Baeza Y.  
717 2020. SciPy 1.0: fundamental algorithms for scientific computing in Python. *Nat Methods*  
718 **17**:261–272. doi:10.1038/s41592-019-0686-2
- 719 Wang G, Chow RD, Bai Z, Zhu L, Errami Y, Dai X, Dong MB, Ye L, Zhang X, Renauer PA, Park  
720 JJ, Shen L, Ye H, Fuchs CS, Chen S. 2019. Multiplexed activation of endogenous genes  
721 by CRISPRa elicits potent antitumor immunity. *Nat Immunol* **20**:1494–1505.  
722 doi:10.1038/s41590-019-0500-4
- 723 Williamson I, Kane L, Devenney PS, Flyamer IM, Anderson E, Kilanowski F, Hill RE, Bickmore  
724 WA, Lettice LA. 2019. Developmentally regulated Shh expression is robust to TAD  
725 perturbations. *Dev* **146**. doi:10.1242/dev.179523
- 726 Xie S, Duan J, Li B, Zhou P, Hon GC. 2017. Multiplexed Engineering and Analysis of  
727 Combinatorial Enhancer Activity in Single Cells. *Mol Cell* **66**:285-299.e5.  
728 doi:10.1016/j.molcel.2017.03.007
- 729 Yokoshi M, Segawa K, Fukaya T. 2020. Visualizing the Role of Boundary Elements in  
730 Enhancer-Promoter Communication. *Mol Cell* **78**:224-235.e5.  
731 doi:10.1016/j.molcel.2020.02.007
- 732 Zaragoza M V., Lewis LE, Sun G, Wang E, Li L, Said-Salman I, Feucht L, Huang T. 2004.  
733 Identification of the TBX5 transactivating domain and the nuclear localization signal. *Gene*  
734 **330**:9–18. doi:10.1016/j.gene.2004.01.017
- 735 Zhao Y, Li L, Zheng G, Jiang W, Deng Z, Wang Z, Lu Y. 2018. CRISPR/dCas9-Mediated  
736 Multiplex Gene Repression in Streptomyces. *Biotechnol J* **13**. doi:10.1002/biot.201800121

Figure S1

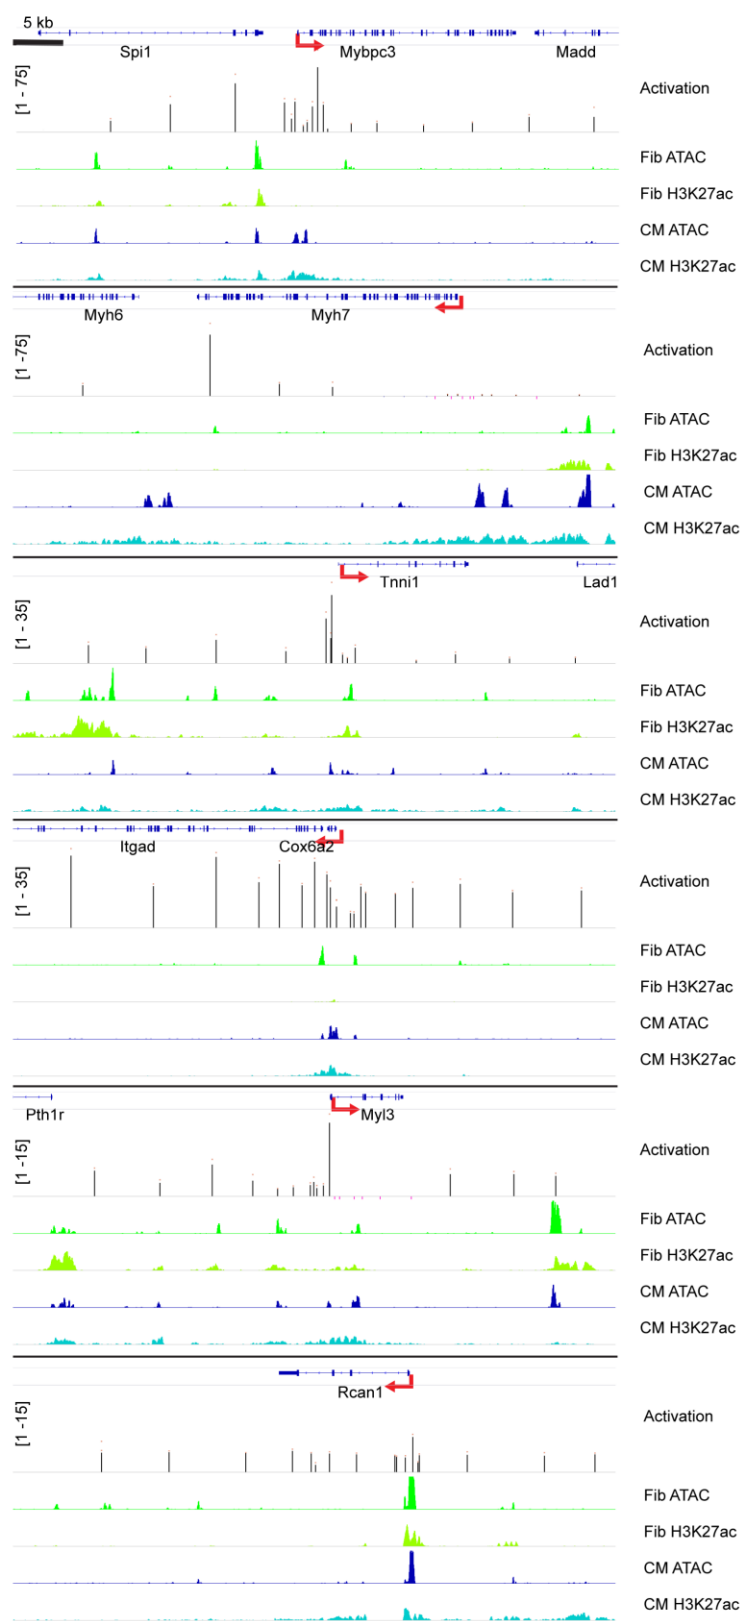

**Fig. S1. High resolution activation maps showing dCas9-VPR can activate genes from multiple sites**

Activation maps shown as multi track diagrams of six cardiomyocyte specific gene loci (*Mybpc3*, *Myh7*, *Tnni1*, *Cox6a2*, *Myl3*, *Rcan1*) are shown at high resolution in a 50 Kbp window around the TSS. Tracks showing (from top to bottom): The genomic track with exons and introns in blue; Activation track showing index gene average fold activation following dCas9-VPR targeting to the genomic site vs. non-targeting gRNA control, as measured by RT-qPCR normalized to *Gapdh* in FIB (Scale of activation for the track is shown in square brackets, average fold activation from each gRNA site in black bars, red dots over bars indicate standard error, all black bars have  $p < 0.05$  vs. control, and sites with non-significant  $p > 0.05$  activation are shown as pink bars on the negative scale for visibility,  $n=3$  for all sites); ATAC-seq and H3K27ac ChIP-seq tracks are shown for FIB in green and CM in blue.

738

Figure S2

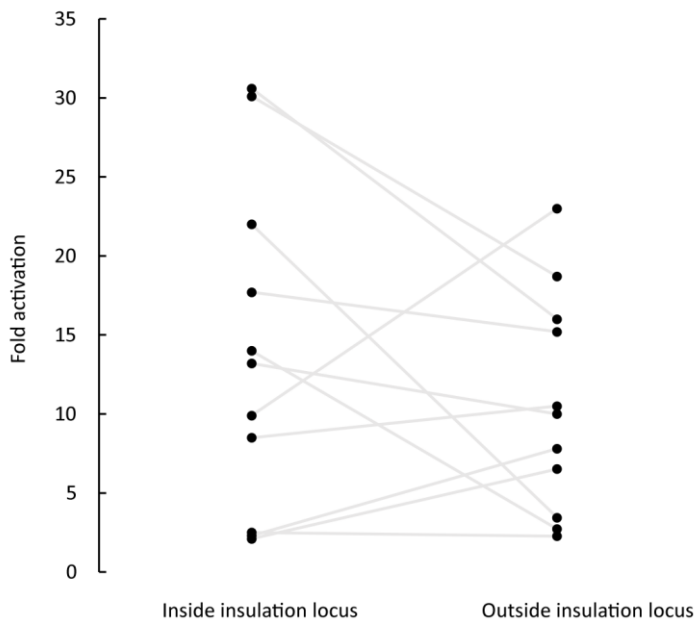

**Fig. S2. Recruitment of dCas9-VPR to sites outside insulation boundaries can induce the expression of genes.**

Comparison of the activation achieved from pairs of sites positioned at the same distance from the TSS of the index gene but lying within or outside the insulation locus of the gene showing no significant difference. ( $n=11$  pairs in the *Mybpc3*, *Cox6a2*, and *Tnni1* loci, paired t-test  $p=0.28$ ).

739

Figure S3

(a)

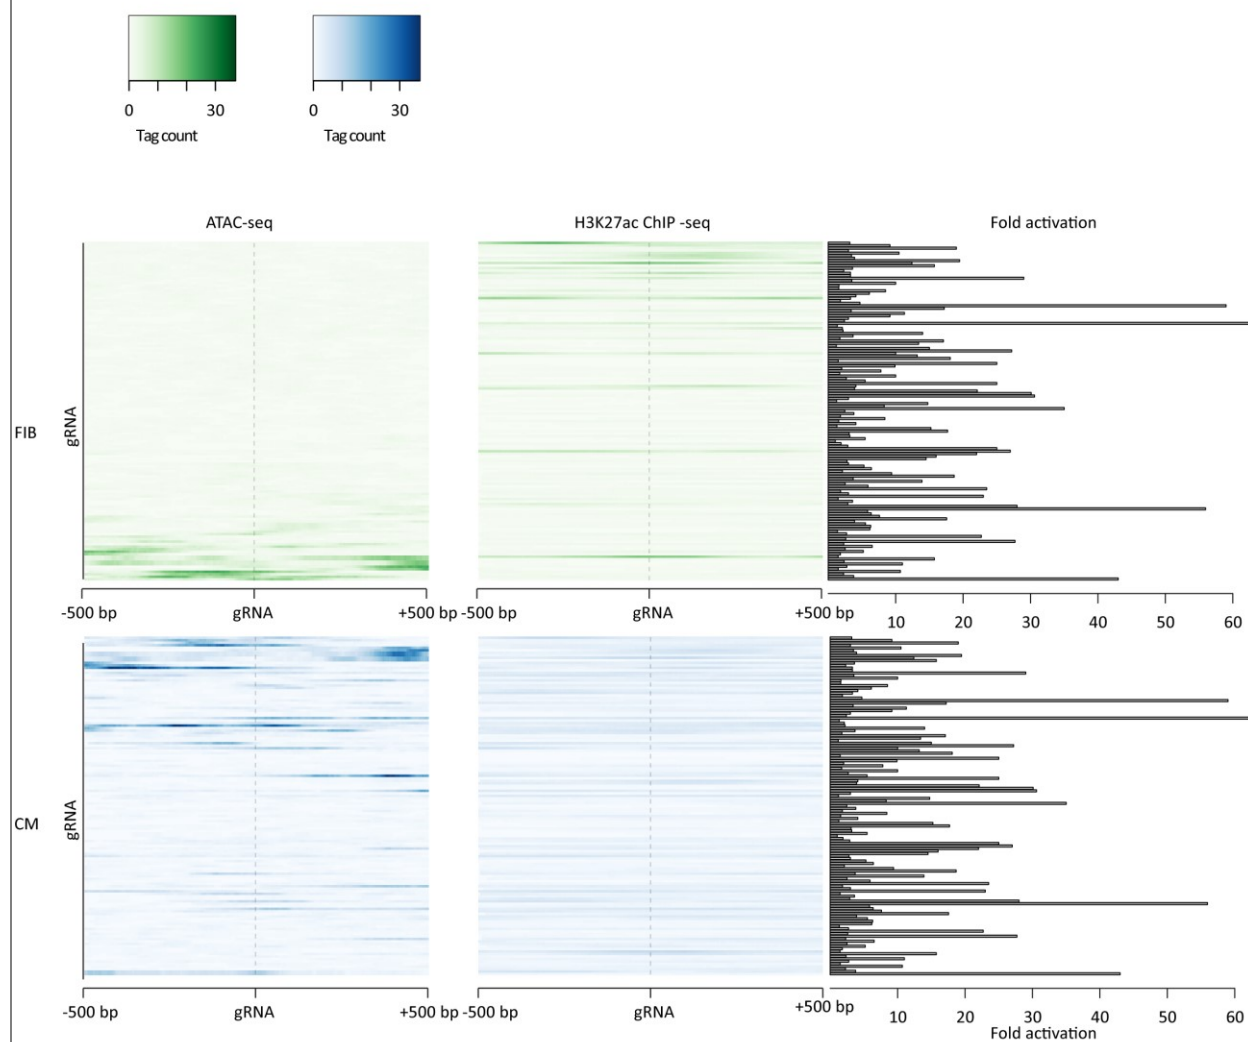

(b)

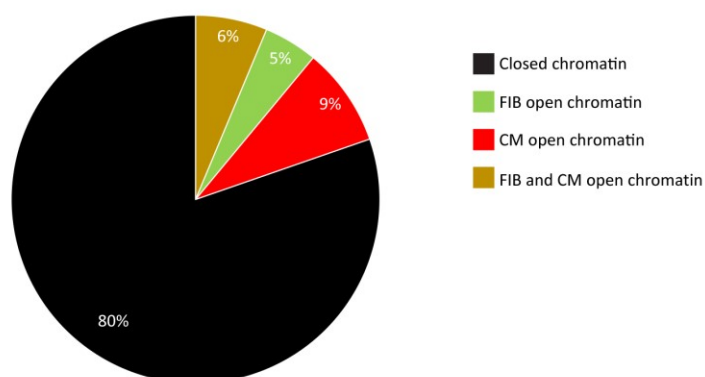

**Fig. S3. Recruitment of dCas9-VPR to non-regulatory sites lacking open chromatin or H3K27ac marks is sufficient to induce the expression of genes.**

(a) Heatmaps of ATAC-seq and H3K27ac signal in fibroblasts (FIB, green) and cardiomyocytes (CM, blue) centered on the gRNA targeting site and spanning  $\pm 500$  bp in each row. Bar plot on the right displays the fold-activation achieved by targeting the site in FIB, showing targeting sites lacking open chromatin or H3K27ac marks can result in strong activation. (b) Pie-chart showing the percent of gRNA sites falling on closed chromatin in both CM and FIB (black), chromatin that is open only in FIB (green), only in CM (red), or open in both FIB and CM (gold).

741

742

743

Figure S4

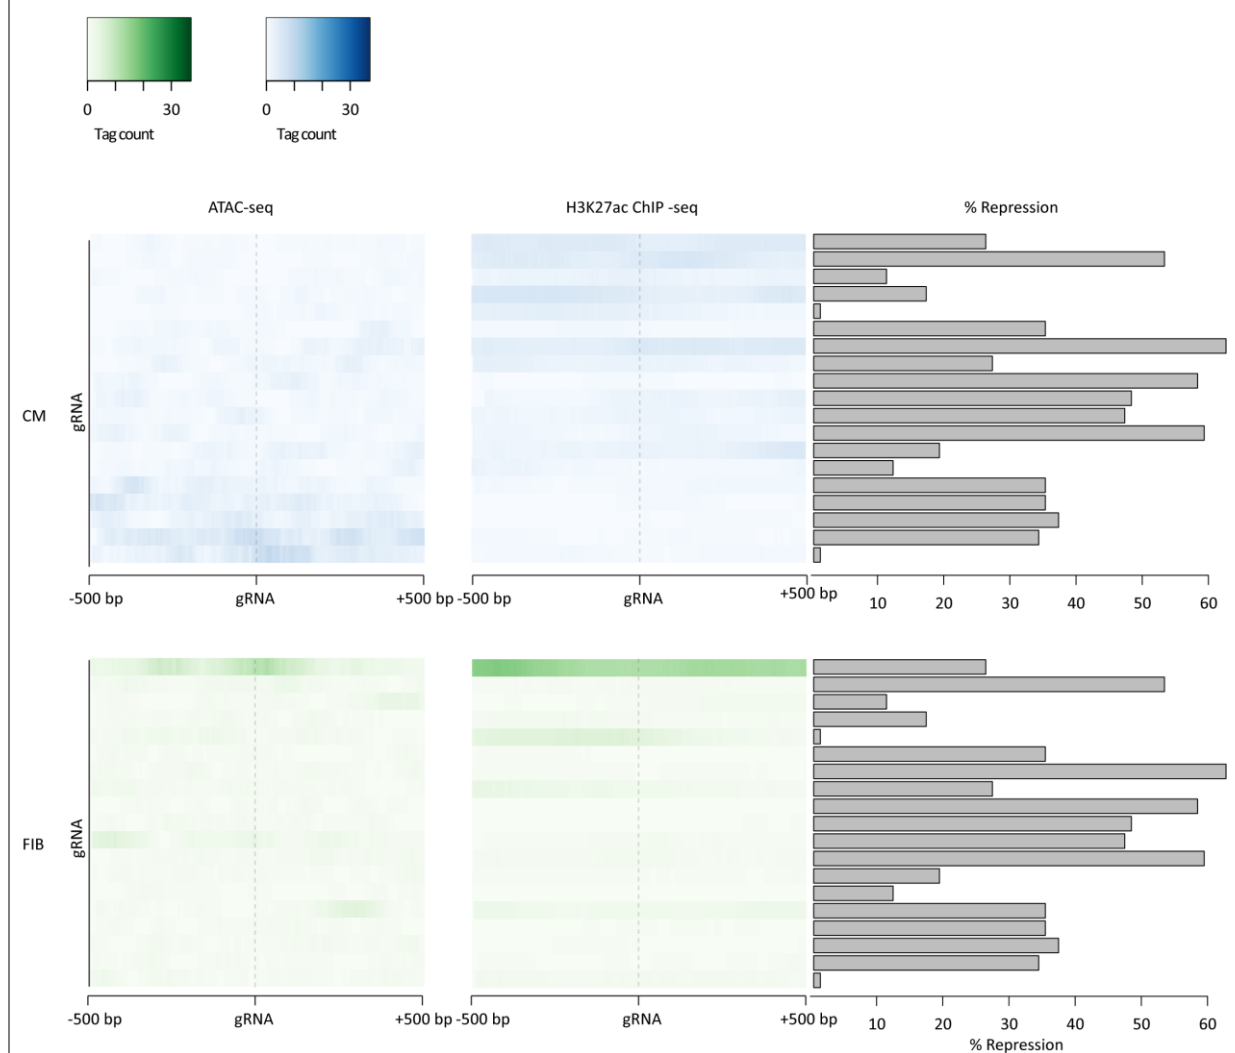

**Fig. S4. Recruitment of dCas9-KRAB to non-regulatory sites lacking open chromatin or H3K27ac marks is sufficient to repress the expression of genes.**

Heatmaps of ATAC-seq and H3K27ac signal in cardiomyocytes (CM, blue) and fibroblasts (FIB, green) centered on the gRNA targeting site and spanning  $\pm 500$  bp in each row. Bar plot on the right indicates the %-repression achieved by targeting the site in CM, showing that targeting sites lacking open chromatin or H3K27ac marks can result in strong repression.
